# Supplementary material for: Iridium-catalyzed asymmetric hydroalkynylation reactions of oxabenzonorbornadienes
Source: Royal Society of Chemistry journal article supplement (doi:10.1039/c2ob26775f), 2012-11-14

# Supporting Information

## Iridium-Catalyzed Asymmetric Hydroalkynylation Reactions of Oxabenzonorbornadienes

Jun Hu,<sup>a</sup> Qingjing Yang,<sup>a</sup> Jianbin Xu,<sup>a</sup> Chao Huang,<sup>a</sup> Baomin Fan,<sup>a,\*</sup> Jun Wang,<sup>b</sup>  
Chengyuan Lin,<sup>b</sup> Zhaoxiang Bian<sup>b,c</sup> and Albert, S. C. Chan<sup>c,\*</sup>

<sup>a</sup> Key Laboratory of Chemistry in Ethnic Medicinal Resources, State Ethnic Affairs Commission & Ministry of Education, Yunnan University of Nationalities, Kunming, 650500, China. Fax: (+86)-871-5910017, E-mail: [adams.bmf@hotmail.com](mailto:adams.bmf@hotmail.com)

<sup>b</sup> School of Chinese Medicine, Hong Kong Baptist University, Hong Kong, China.

<sup>c</sup> Institute of Creativity, Hong Kong Baptist University, Hong Kong, China. Fax: +852-34112123, E-mail: [ascchan@hkbu.edu.hk](mailto:ascchan@hkbu.edu.hk)

### Table of Contents

|                                                                                              |         |
|----------------------------------------------------------------------------------------------|---------|
| 1. Copies of <sup>1</sup> H and <sup>13</sup> C NMR spectra of compounds 3aa-ak, 3bb-gb..... | S2-S18  |
| 2. Copies of HPLC spectra of compounds 3aa-ak,3bb-gb.....                                    | S19-S35 |

# 1. Copies of $^1\text{H}$ and $^{13}\text{C}$ NMR spectra of compounds 3aa-ak, 3bb-gb

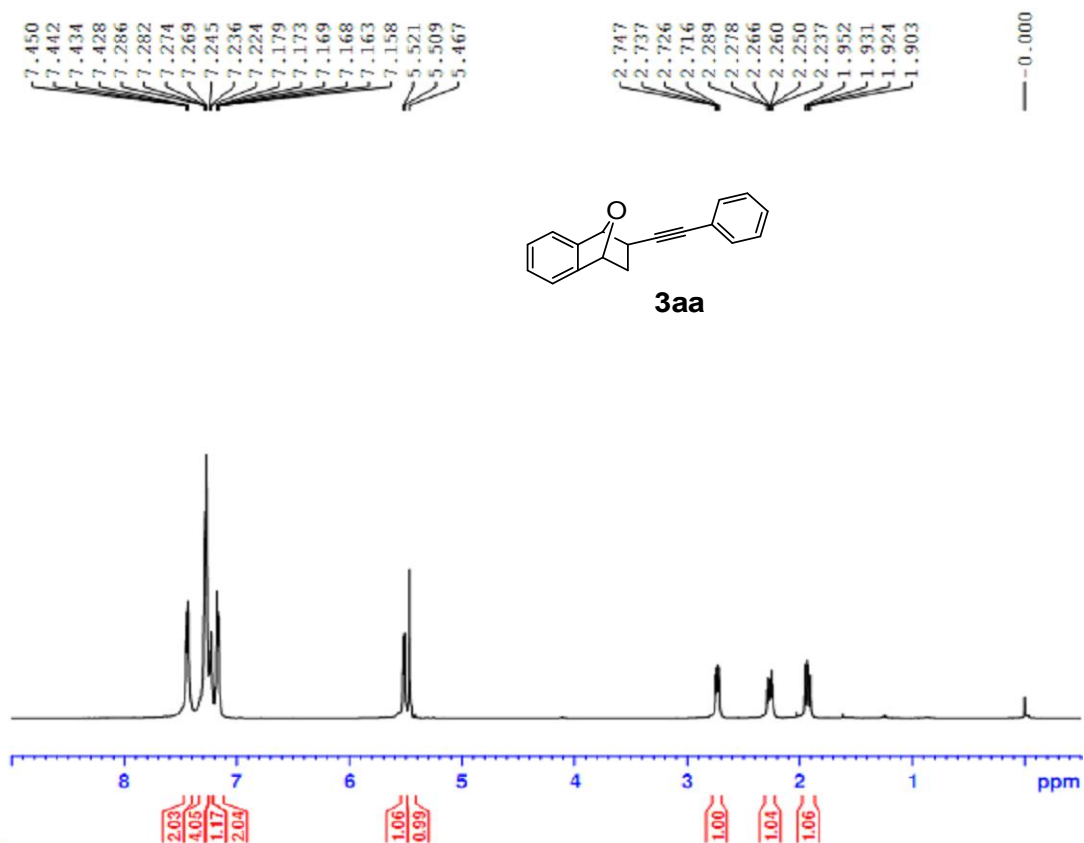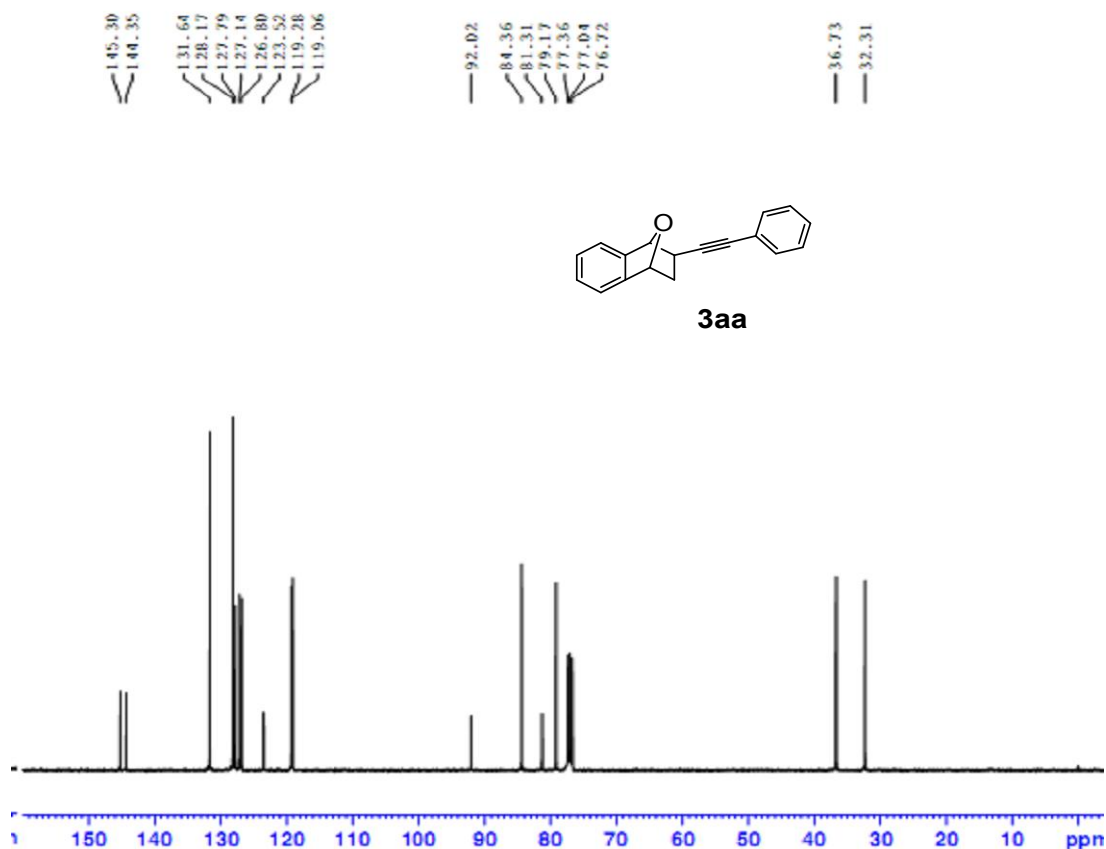

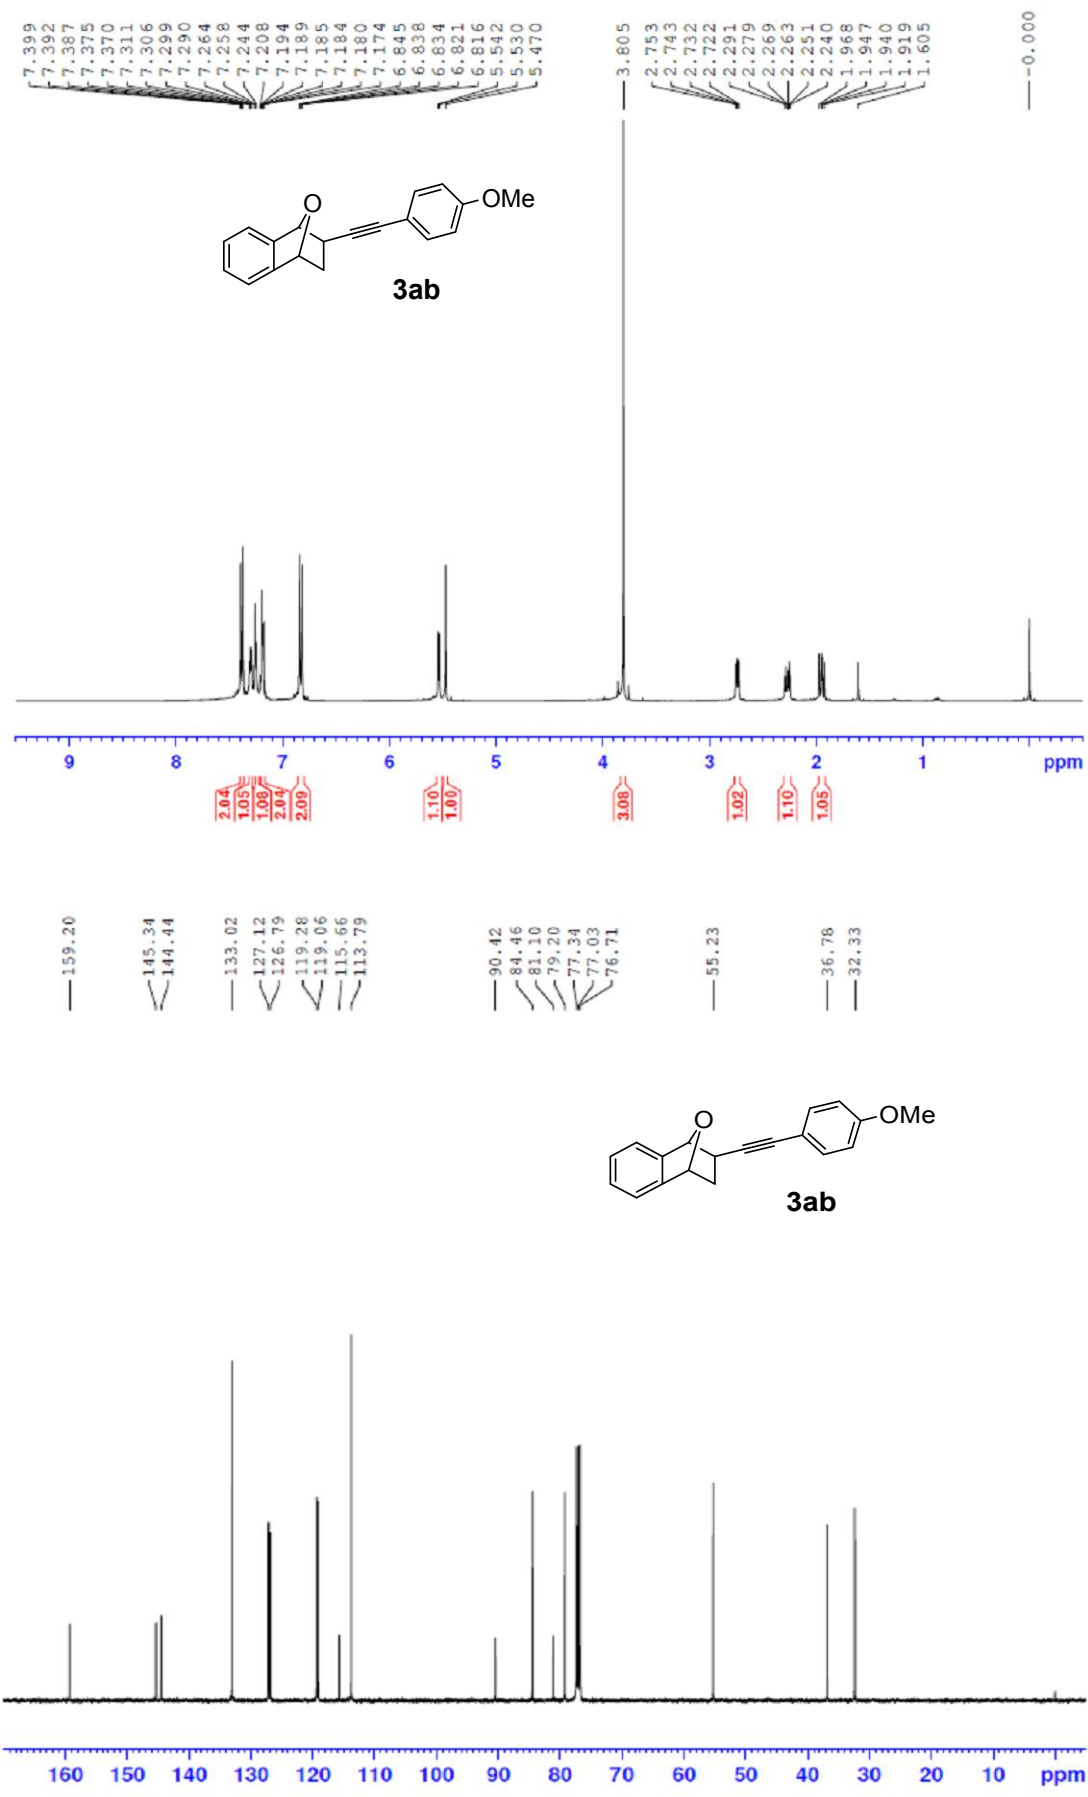

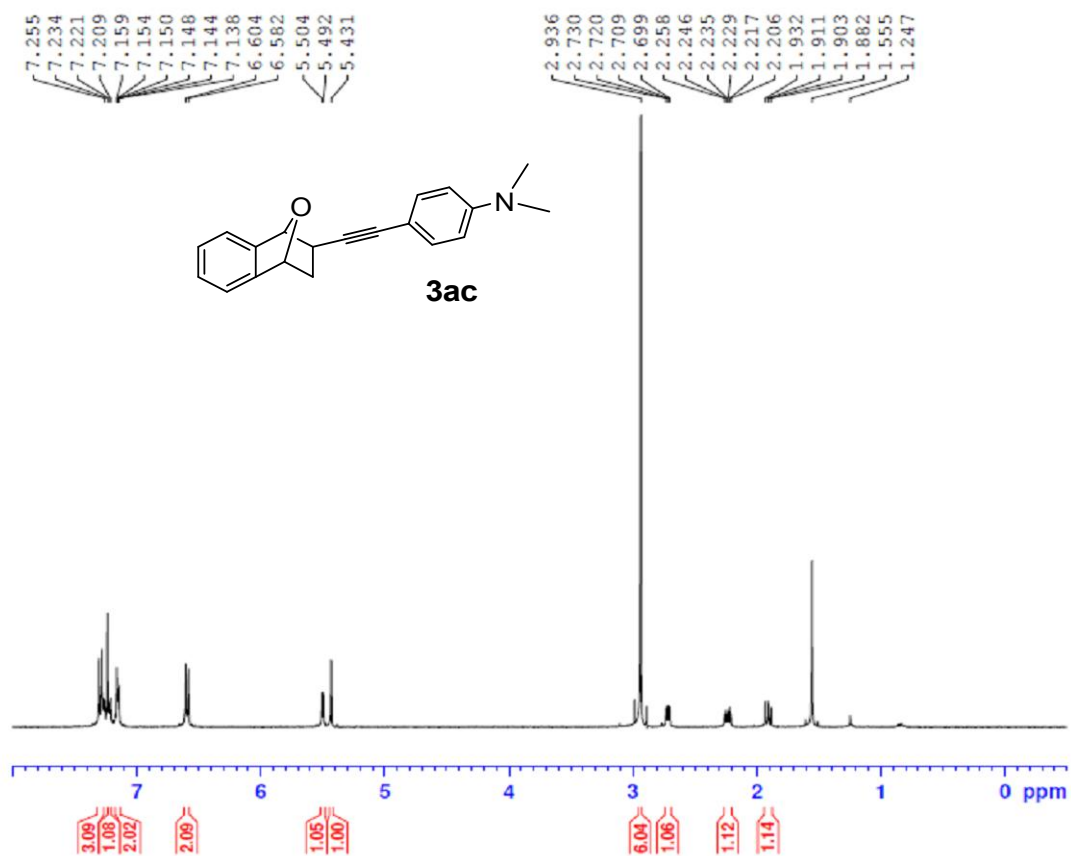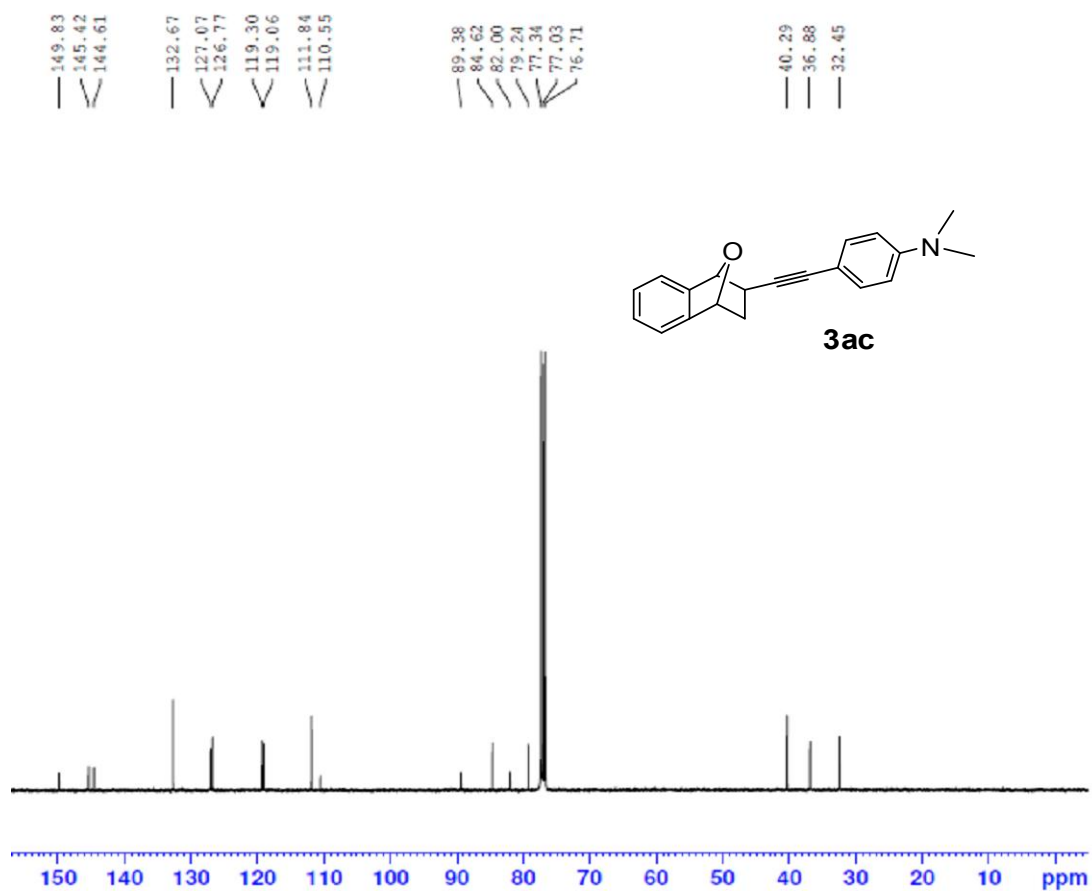

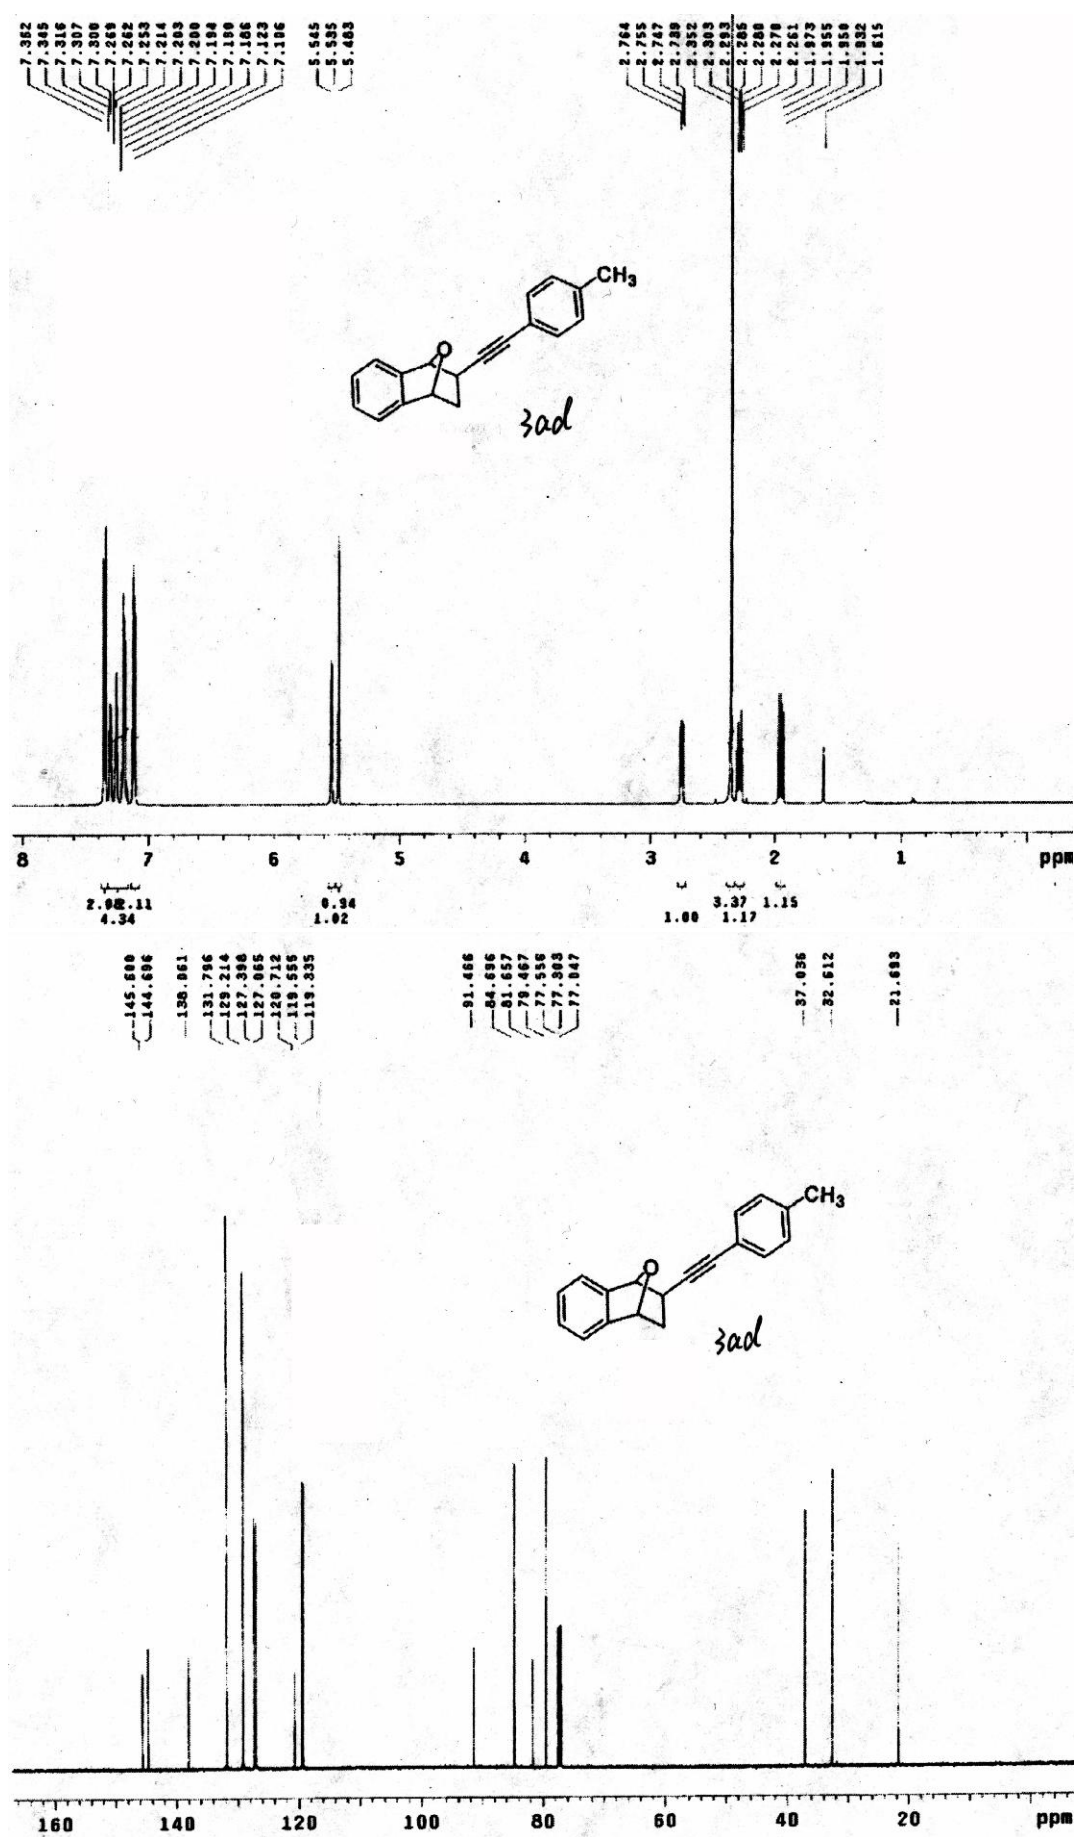

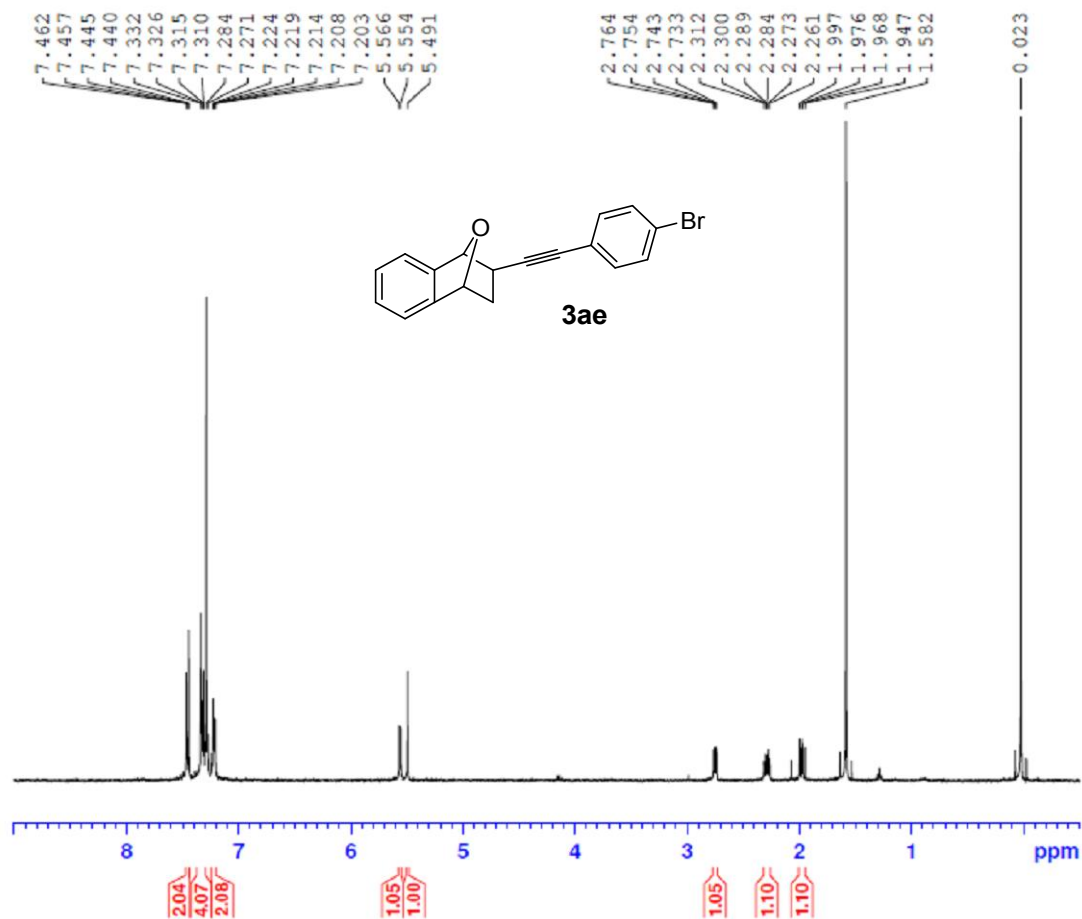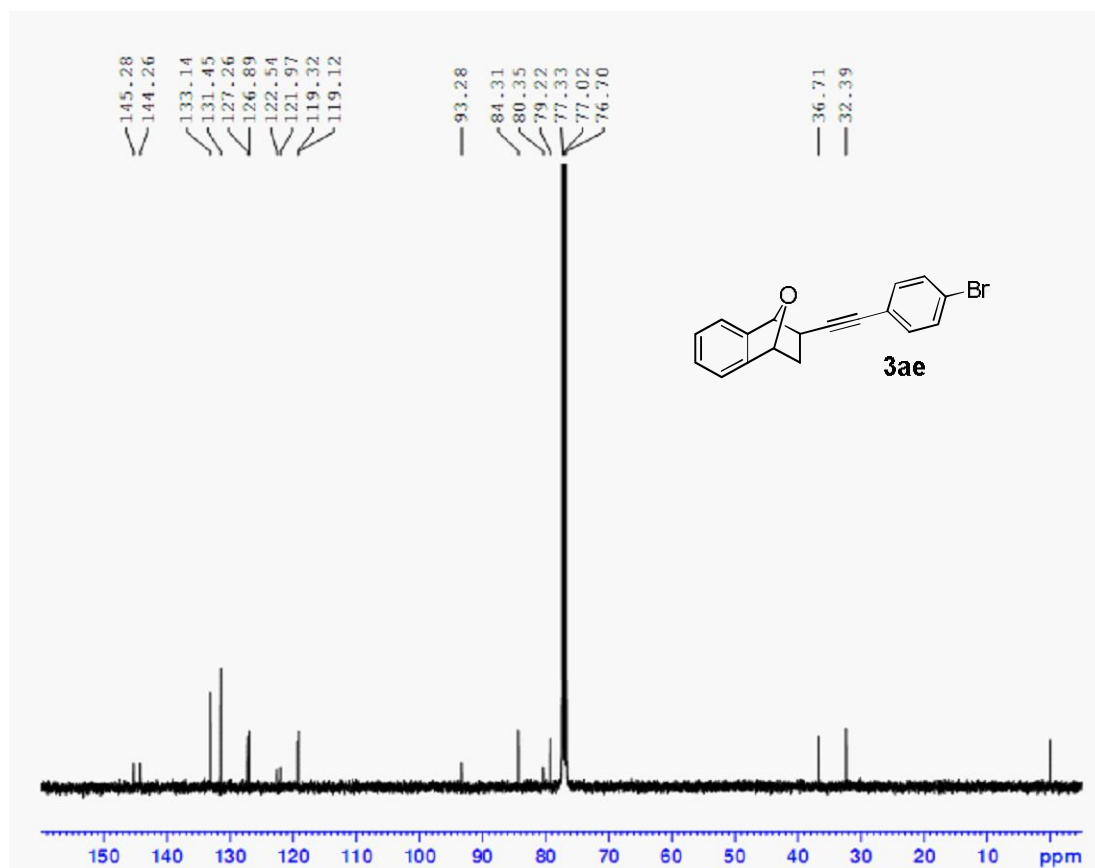



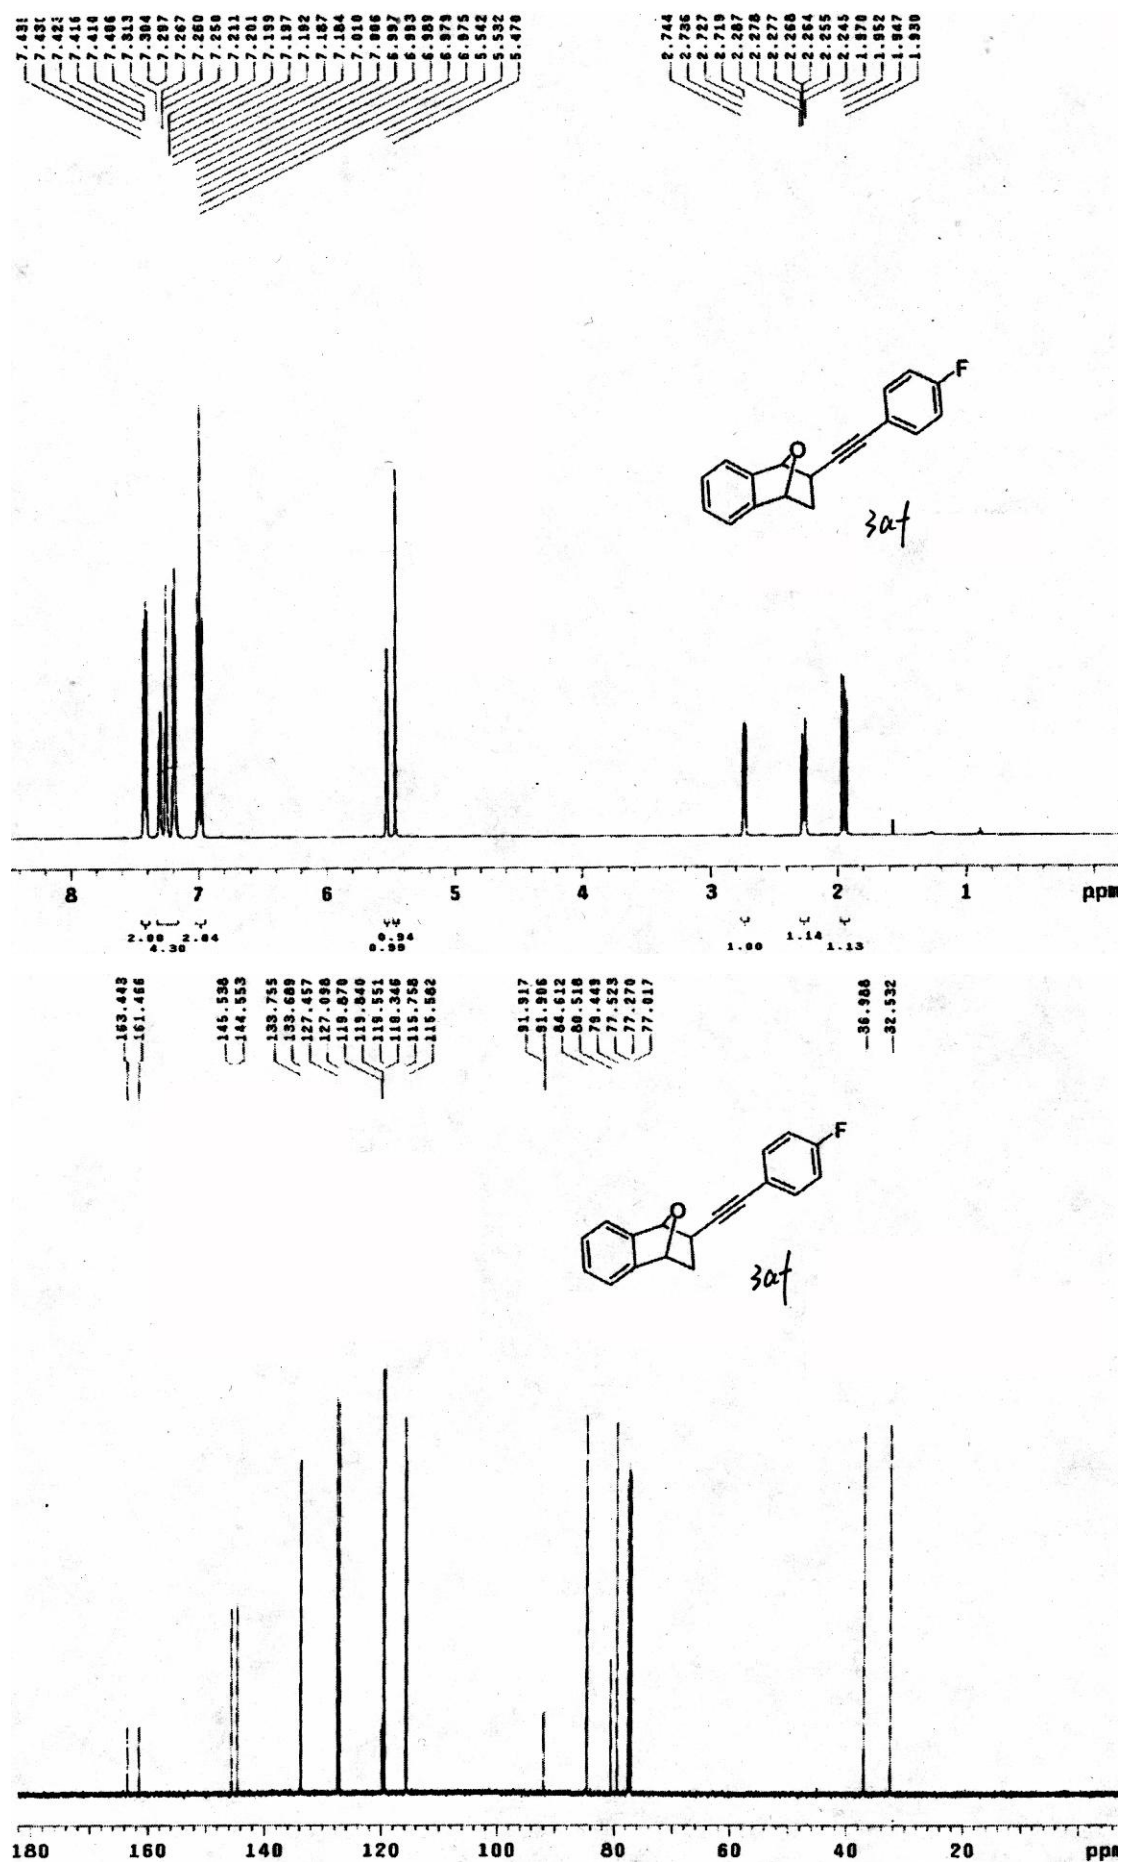

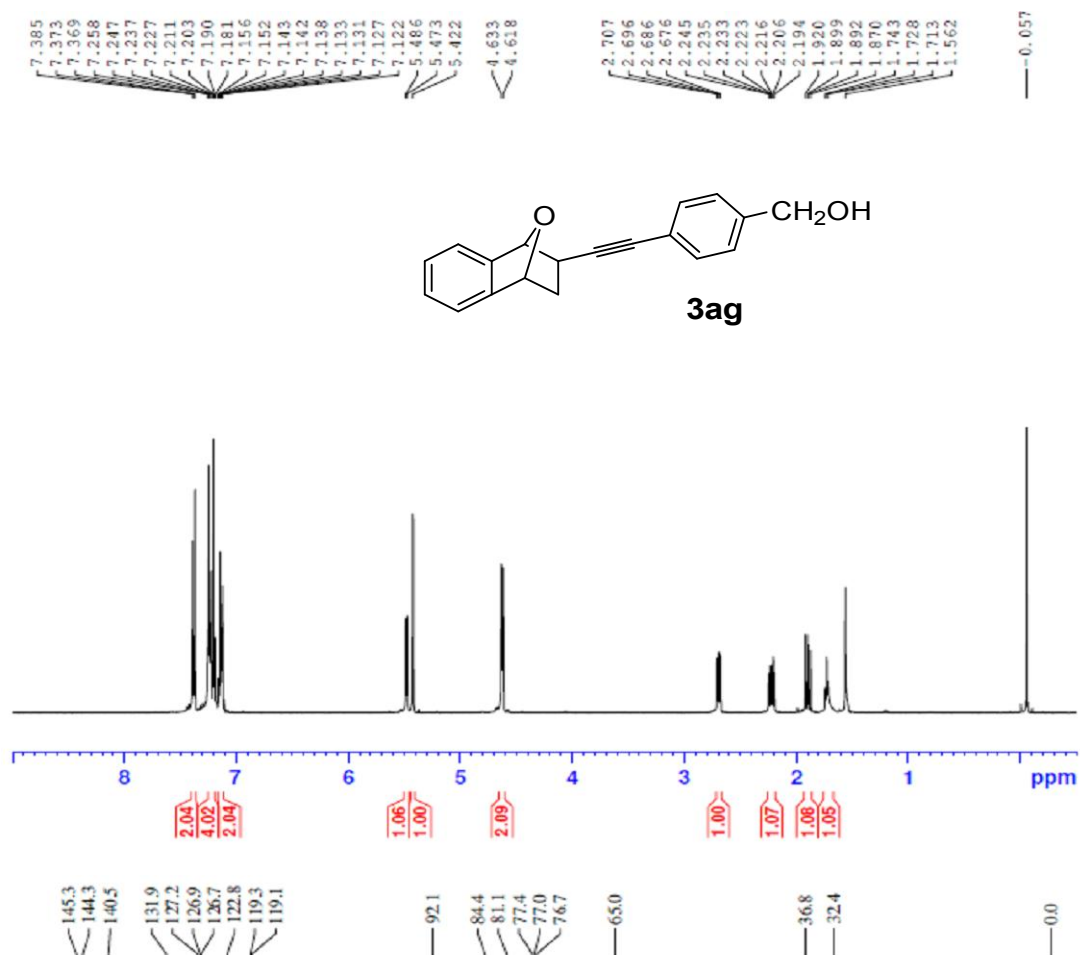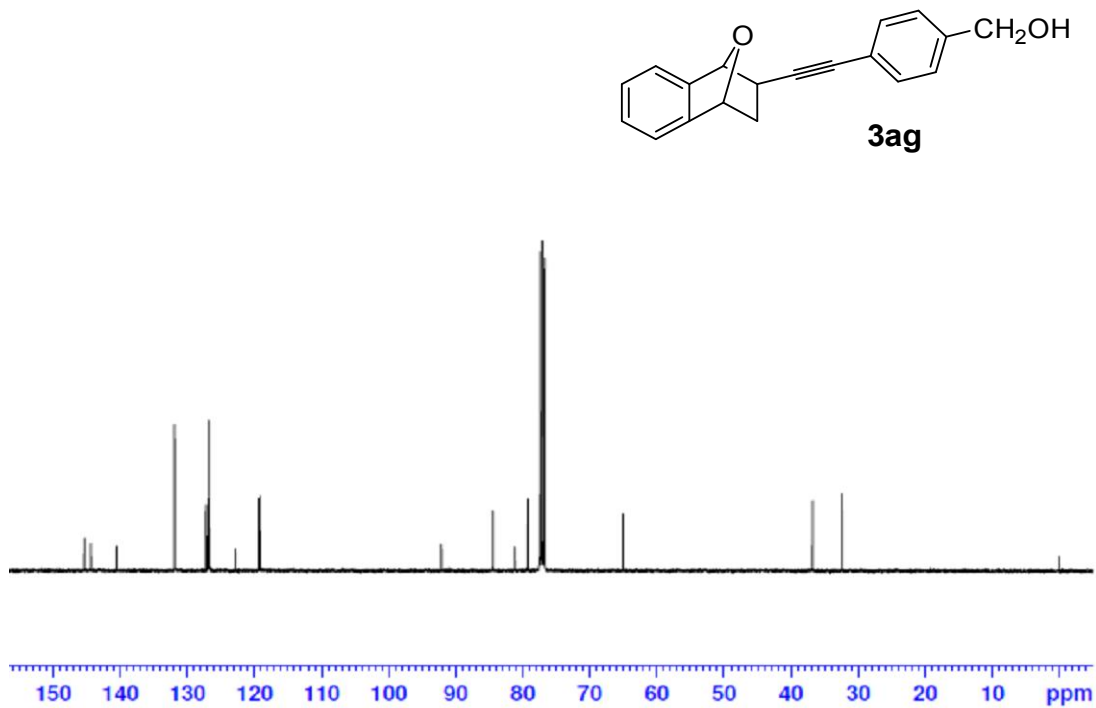



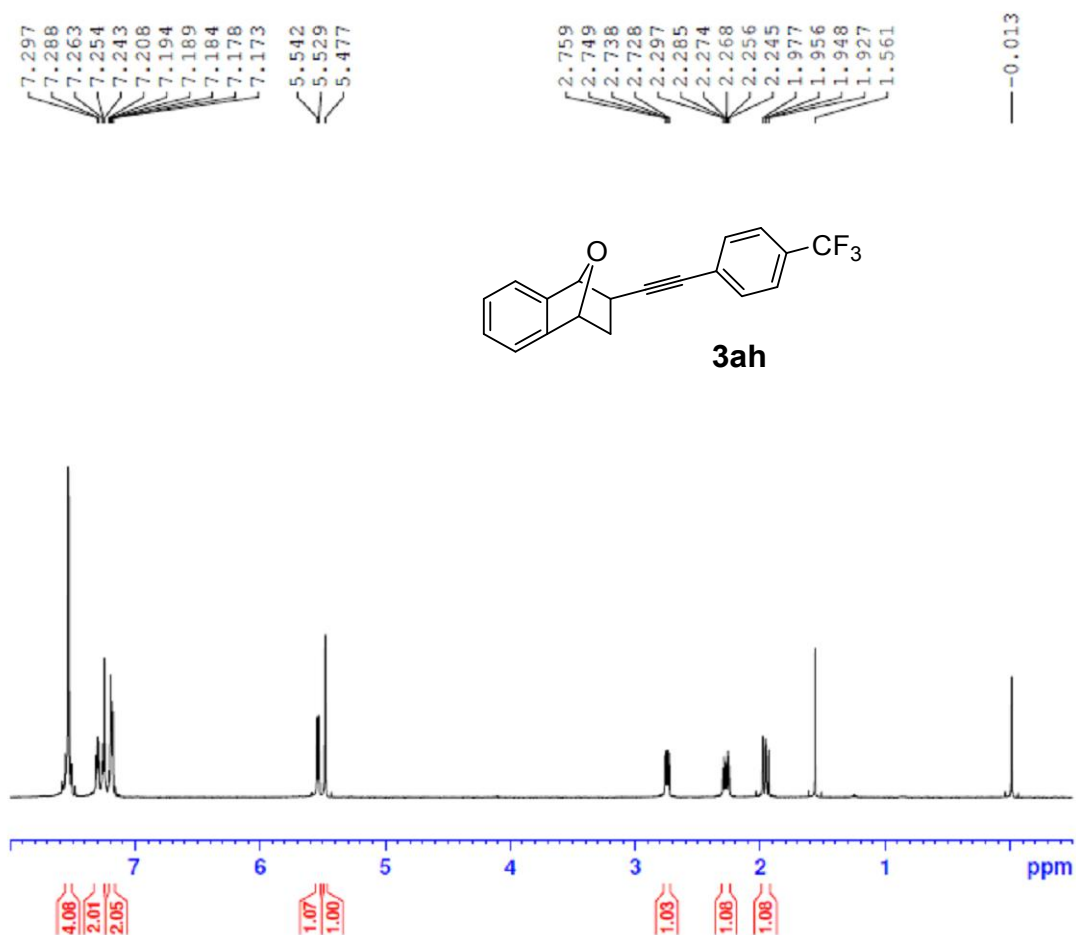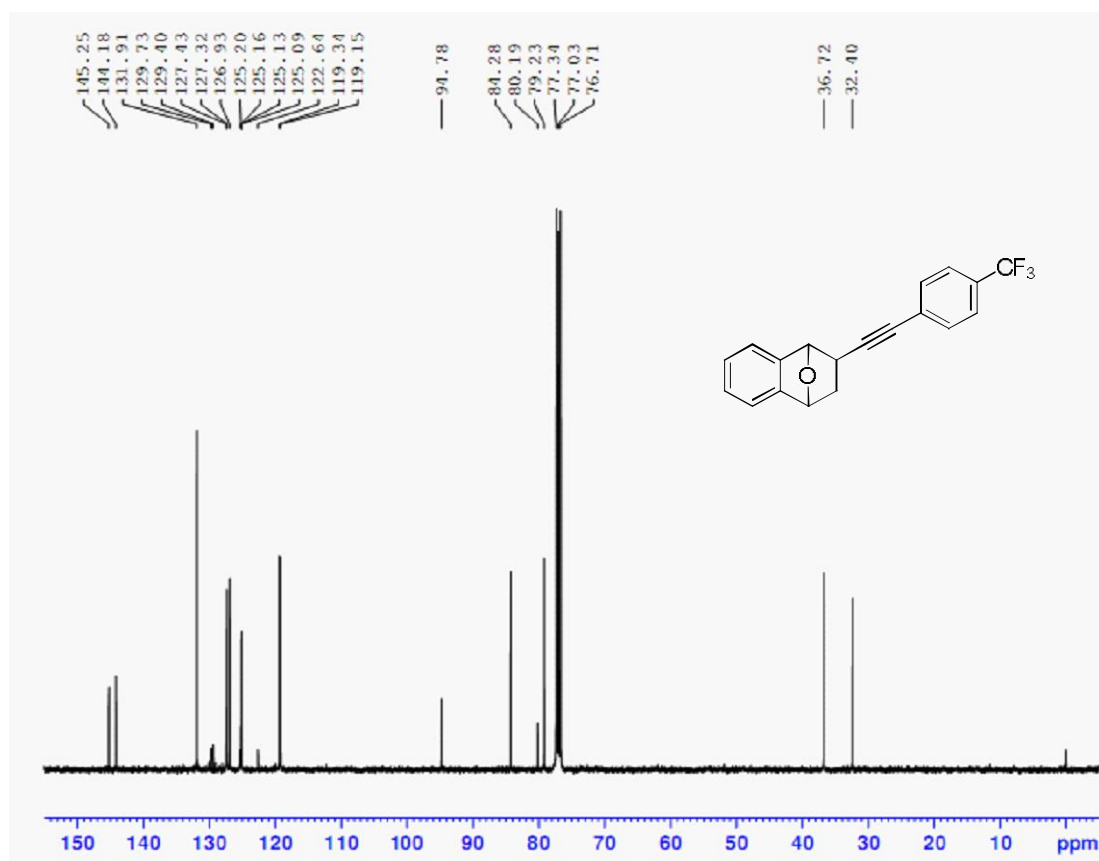

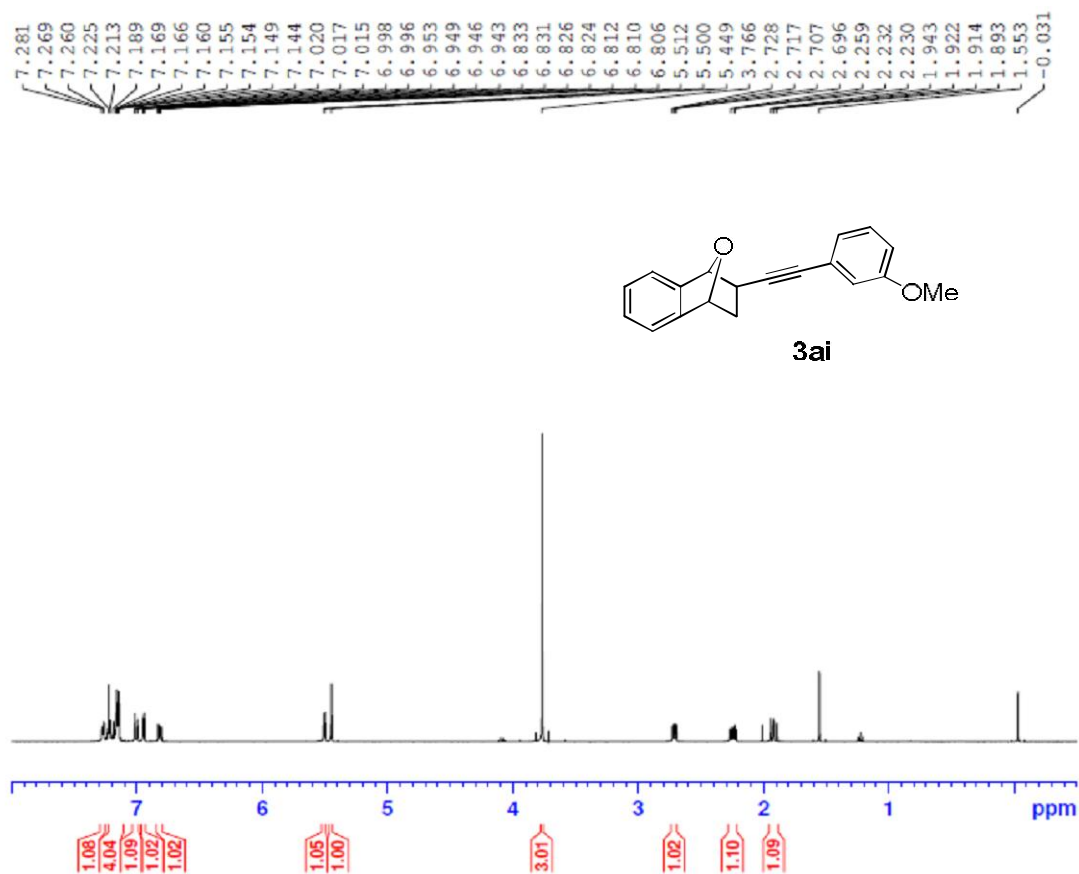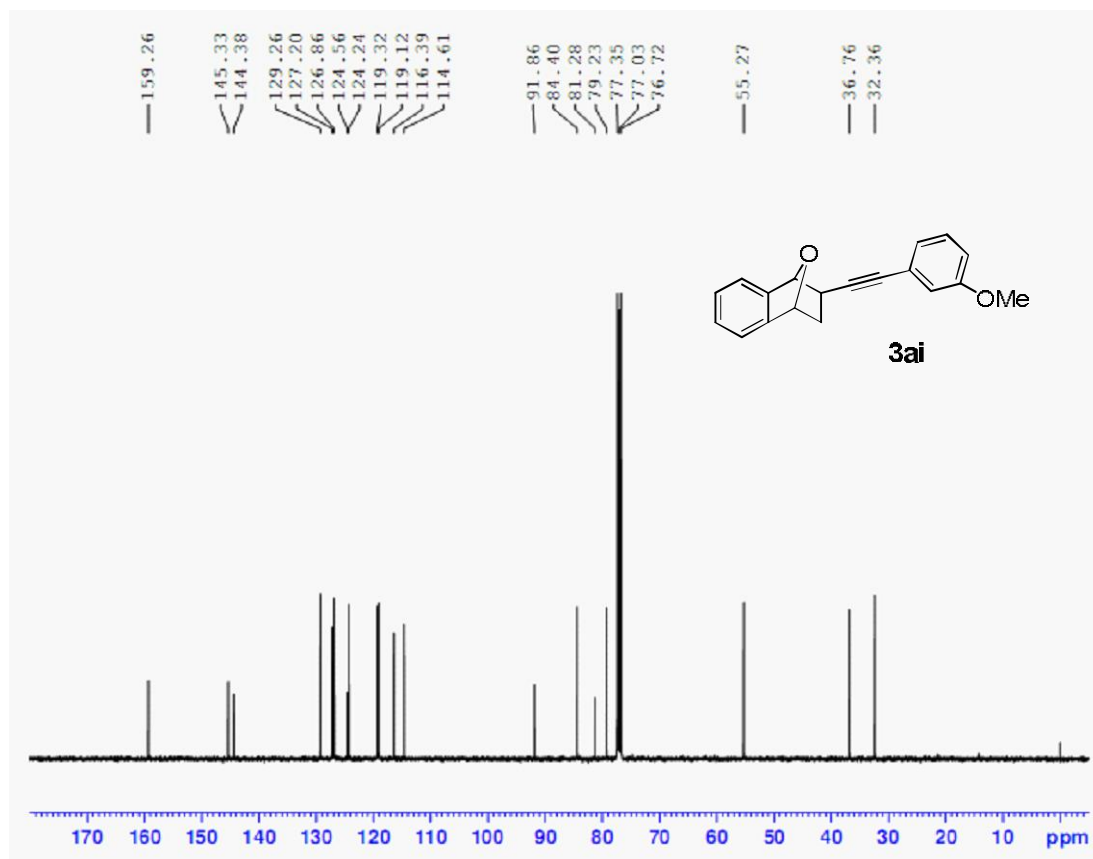

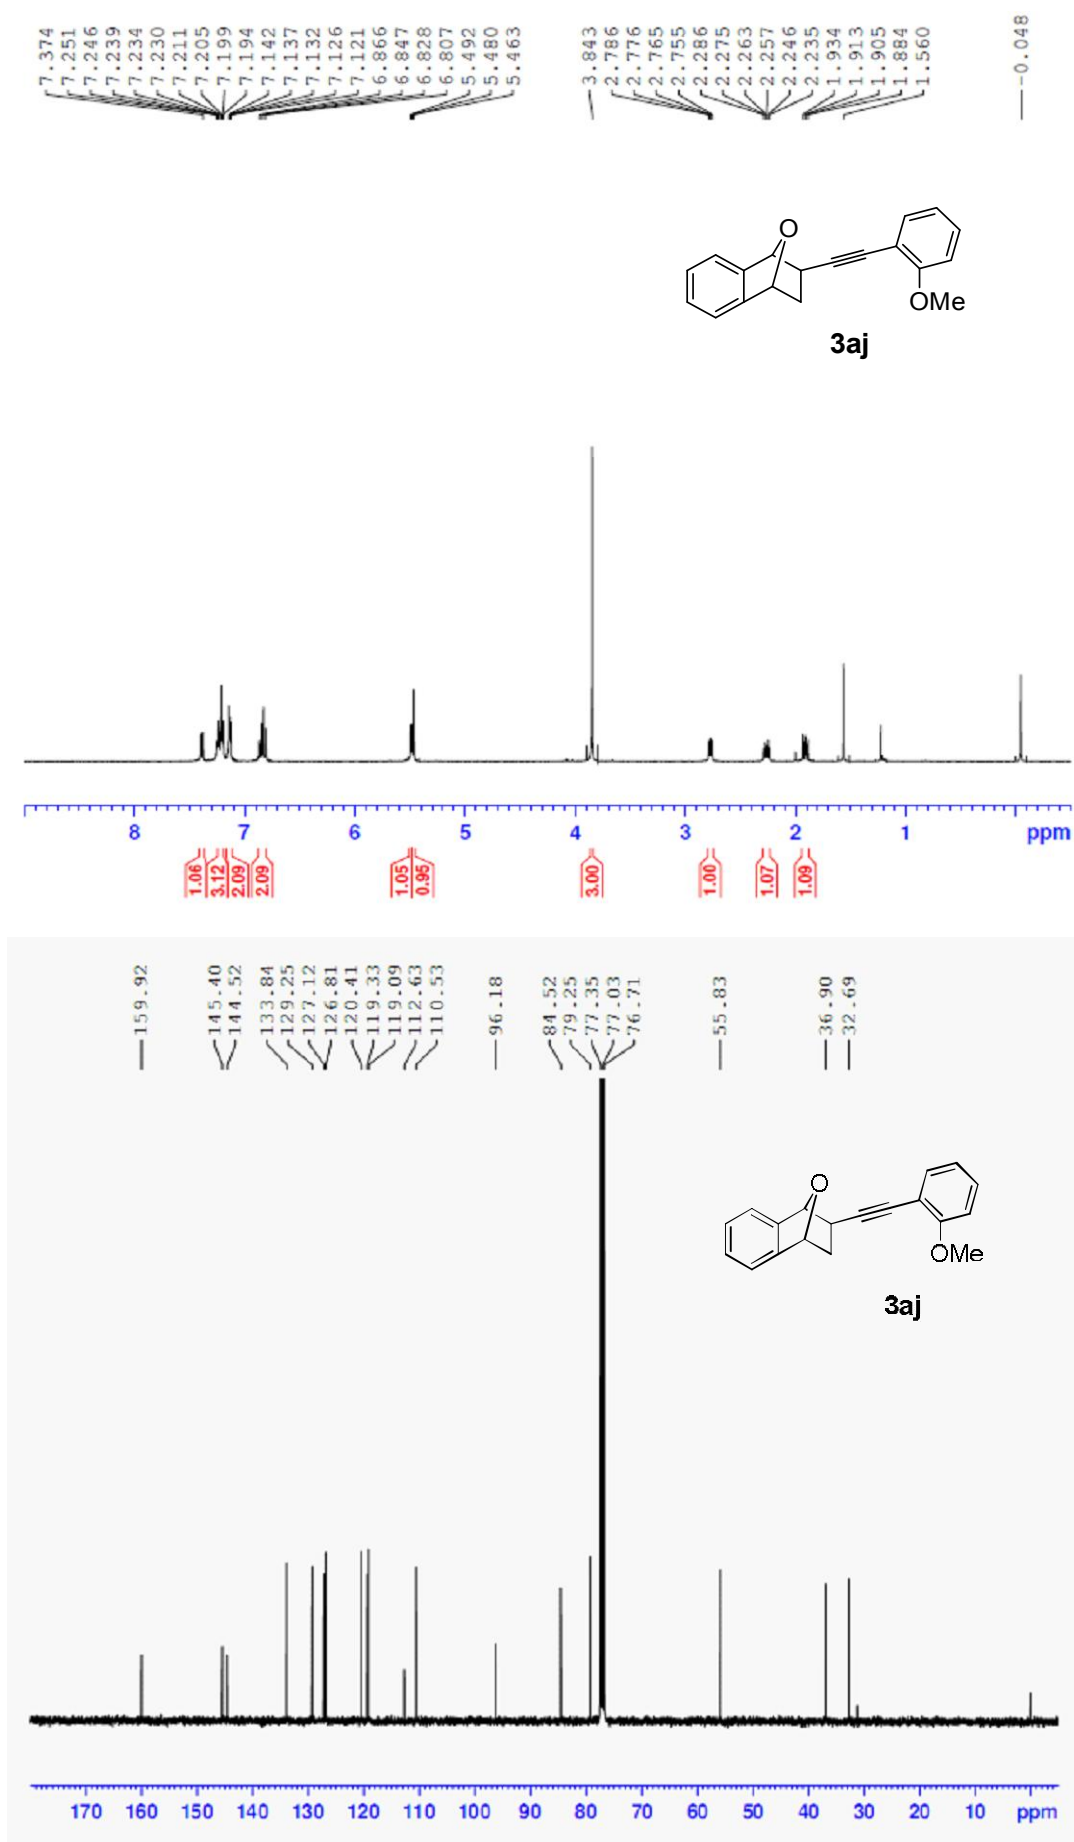

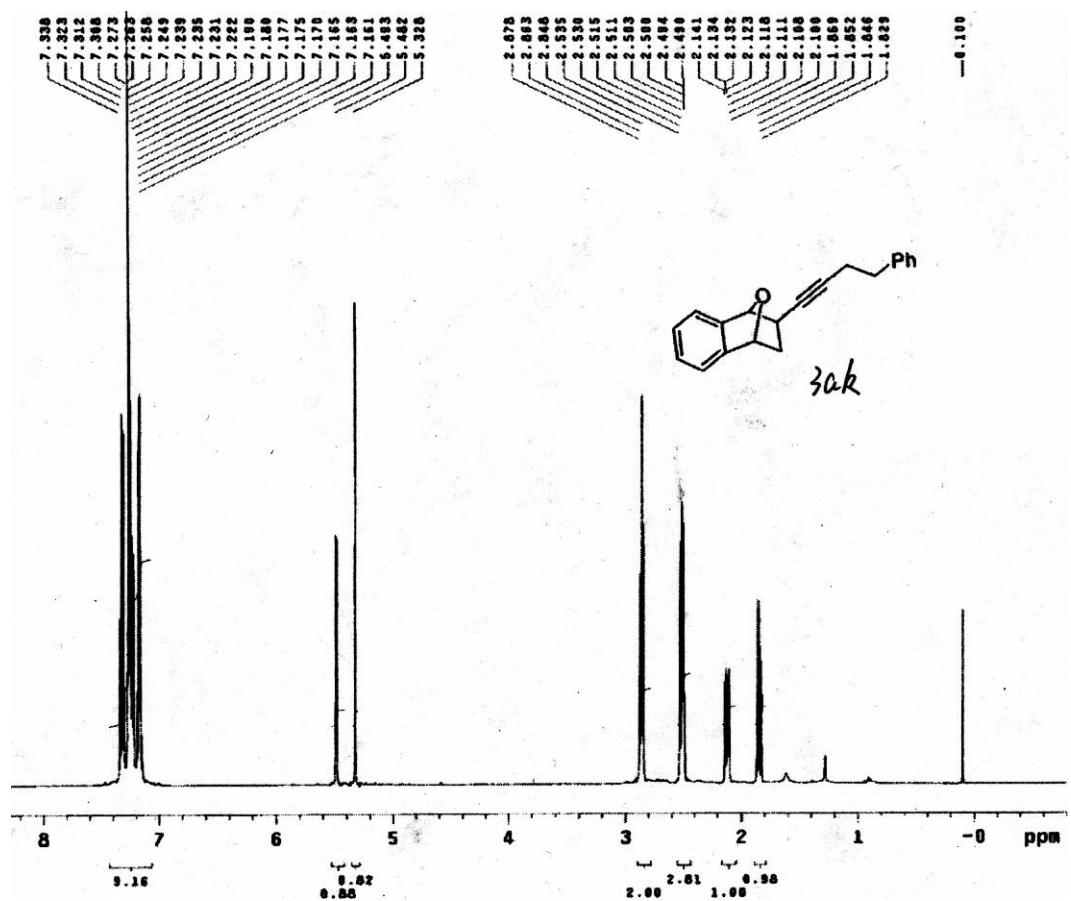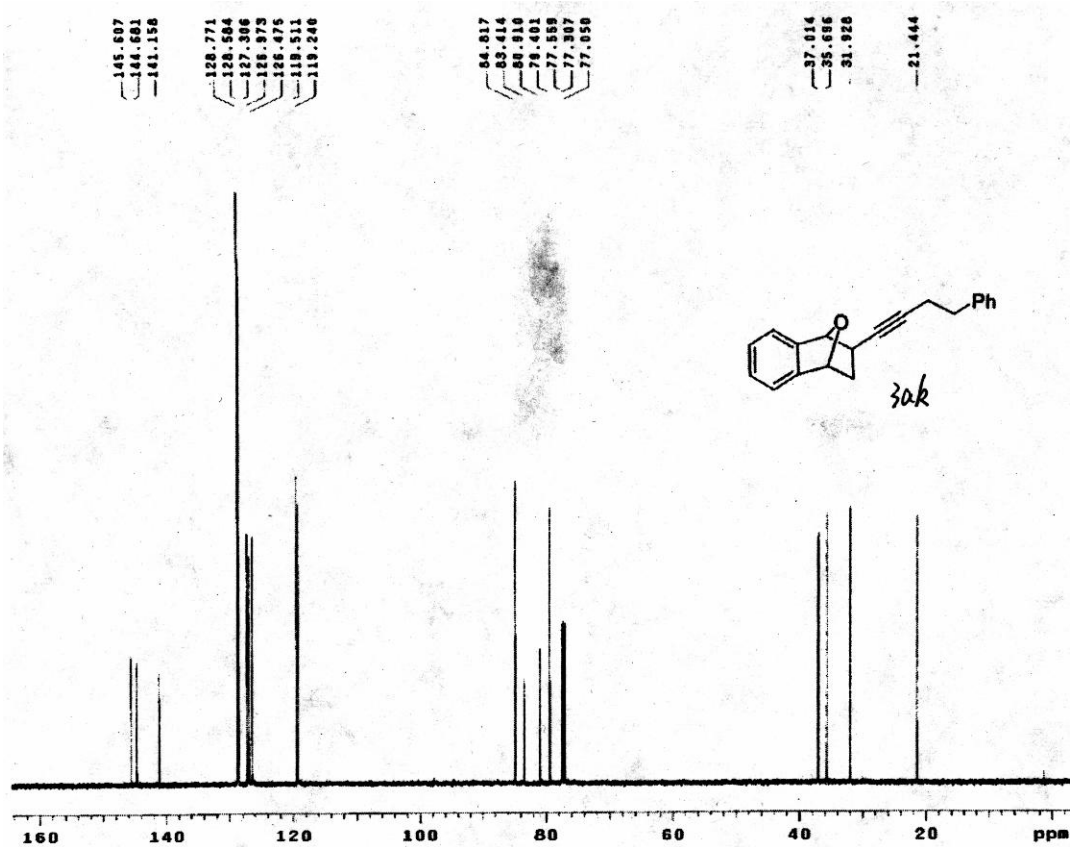

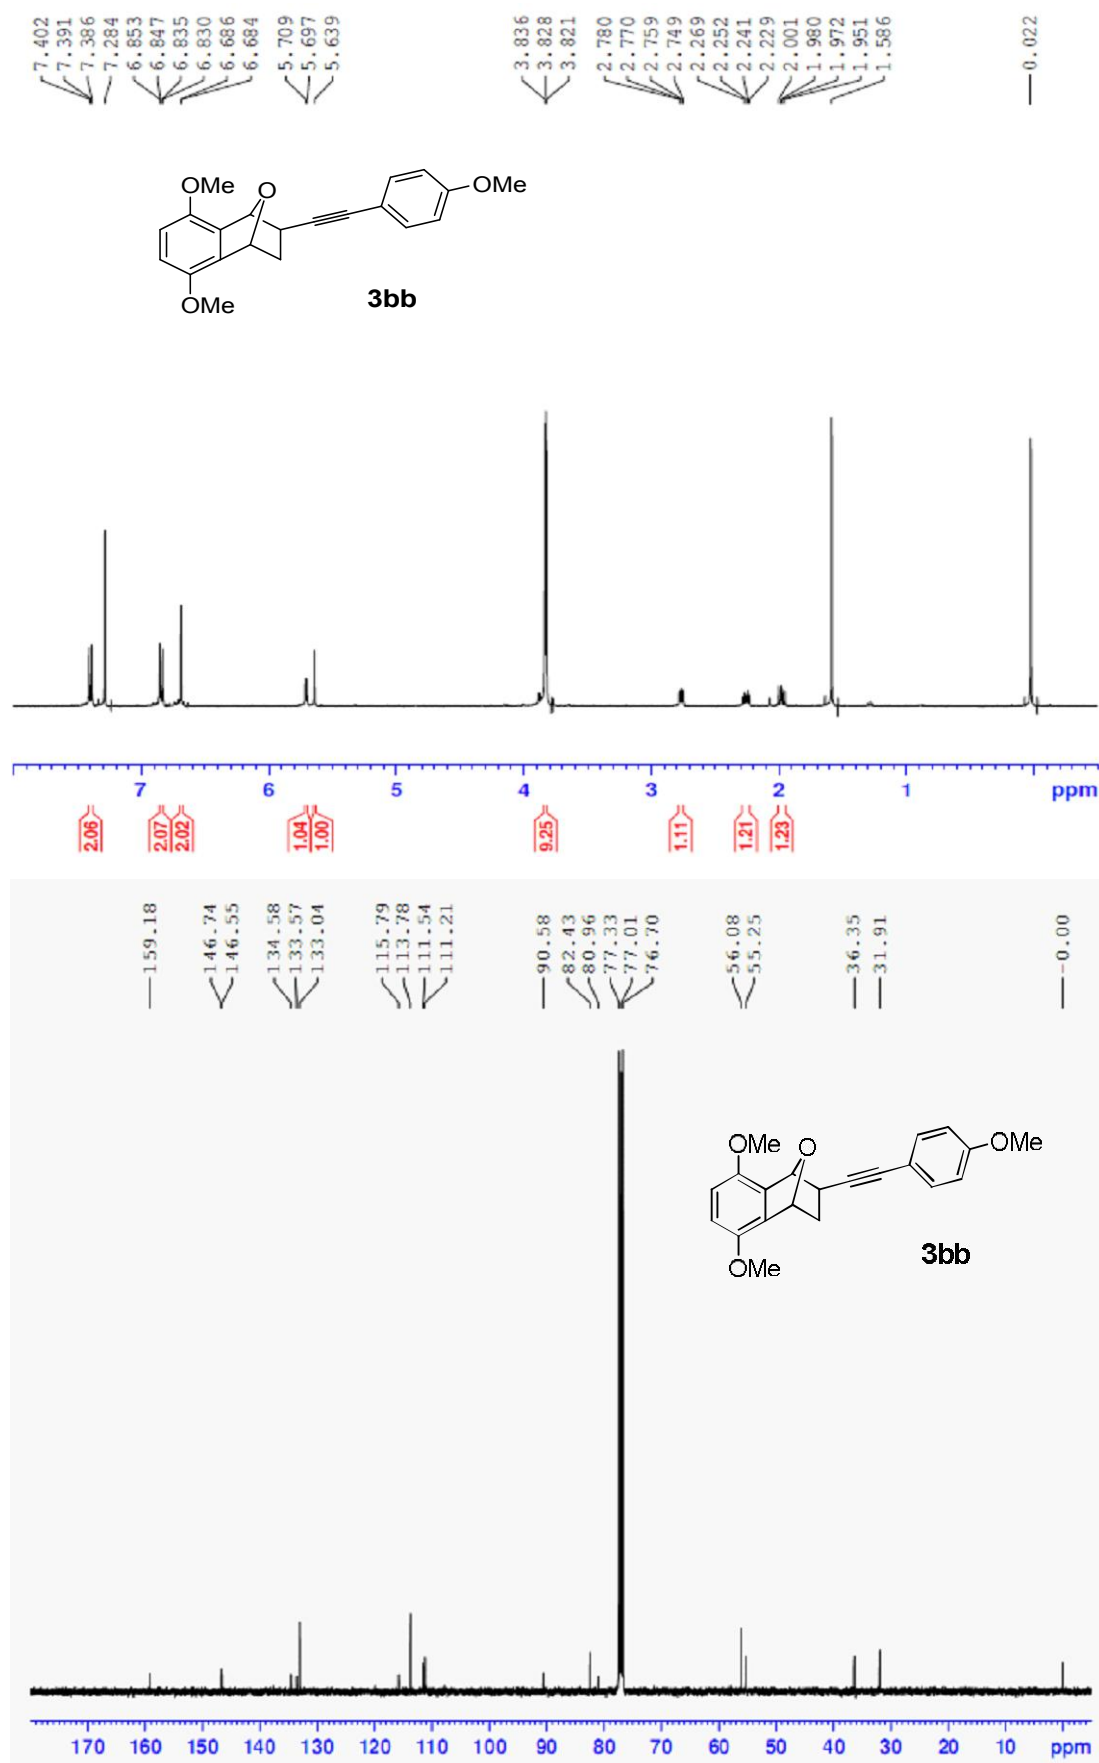

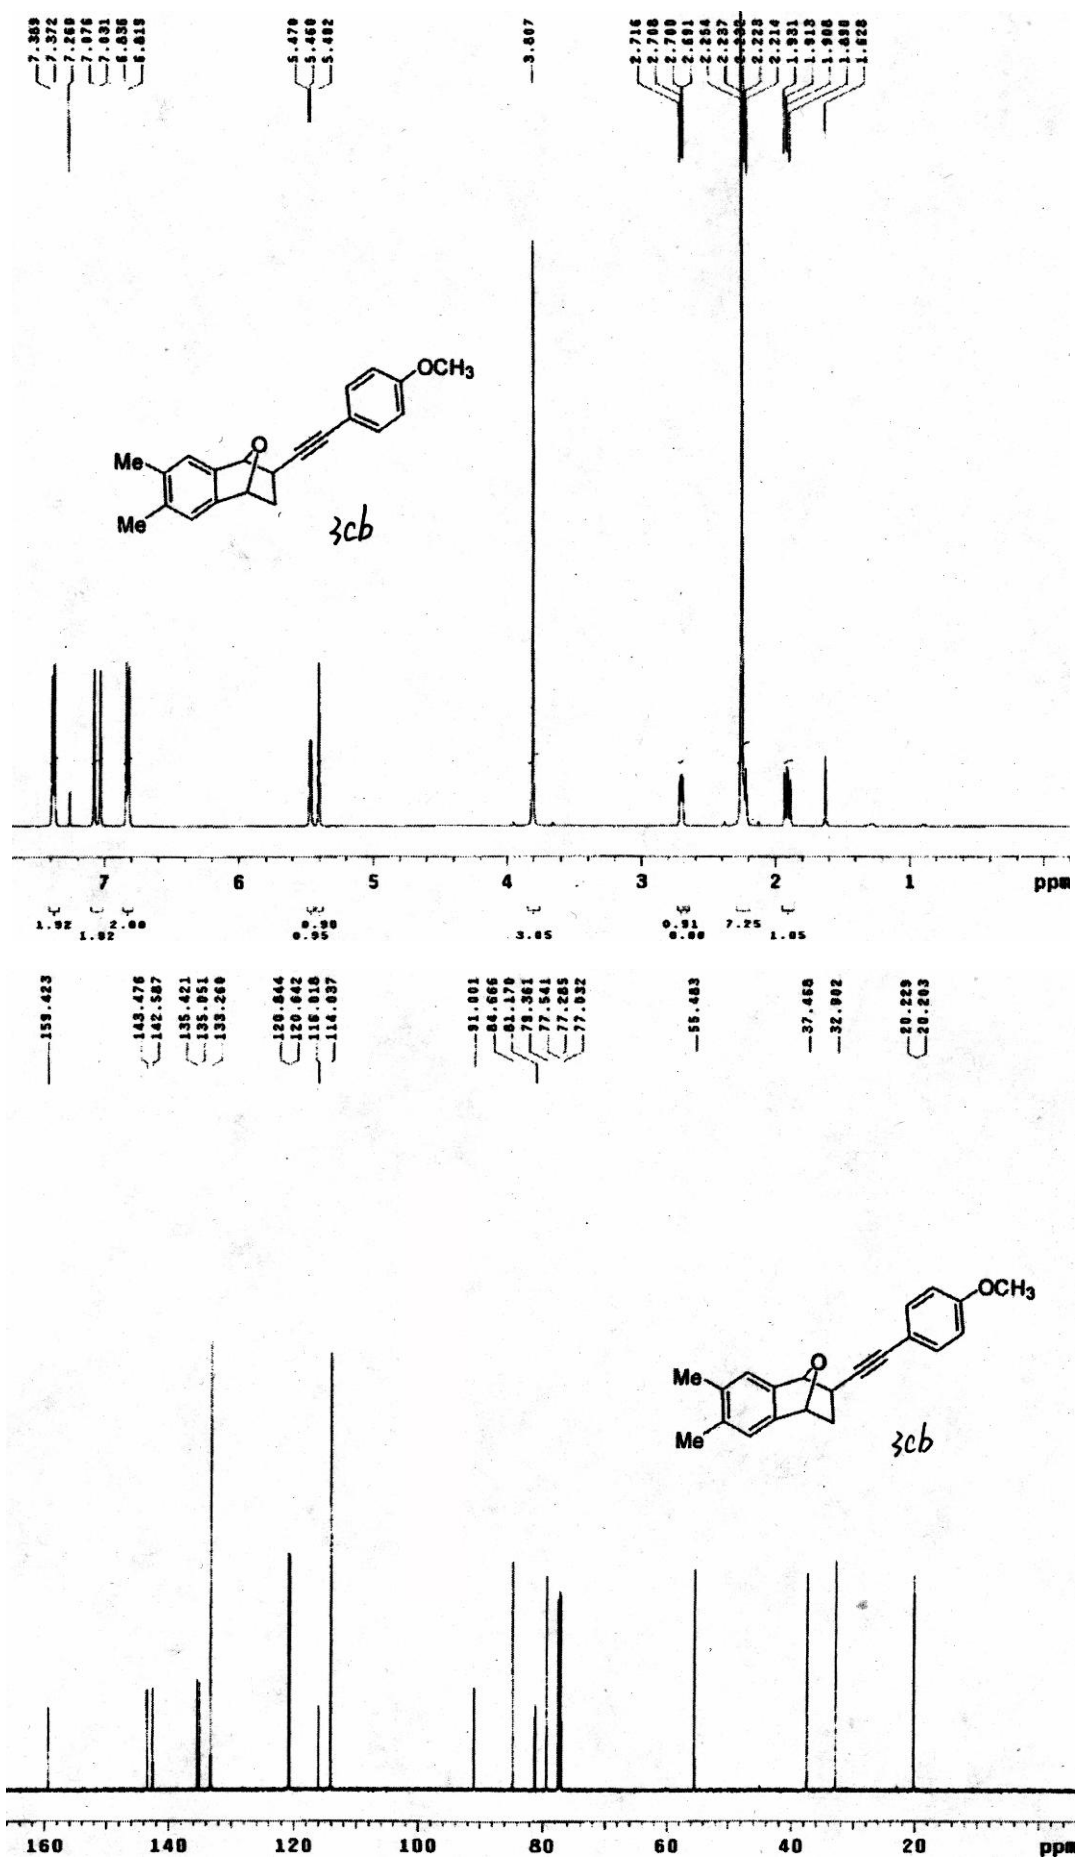



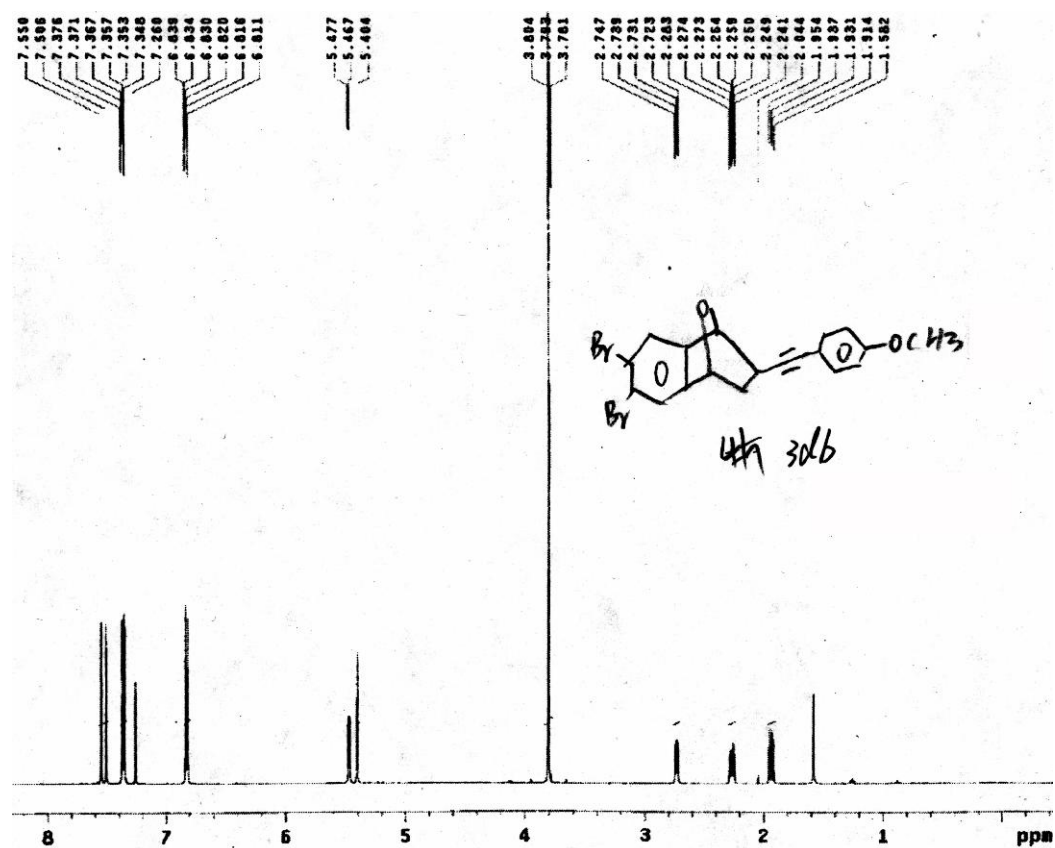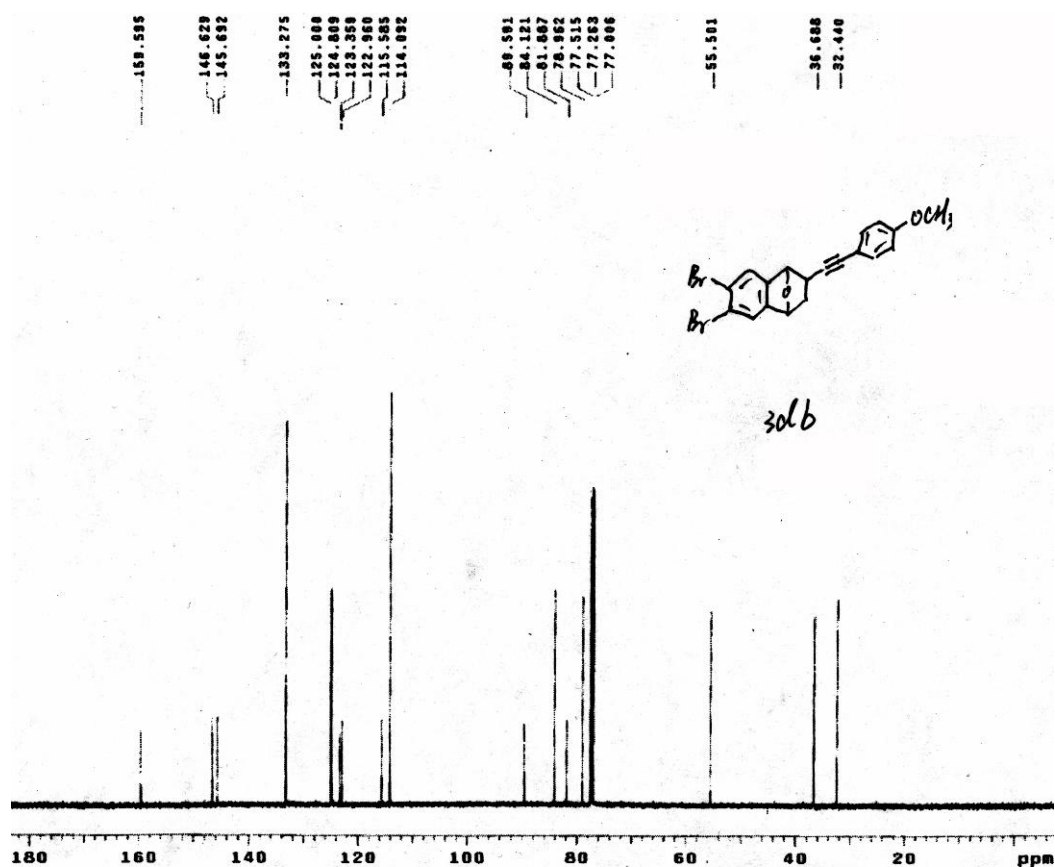



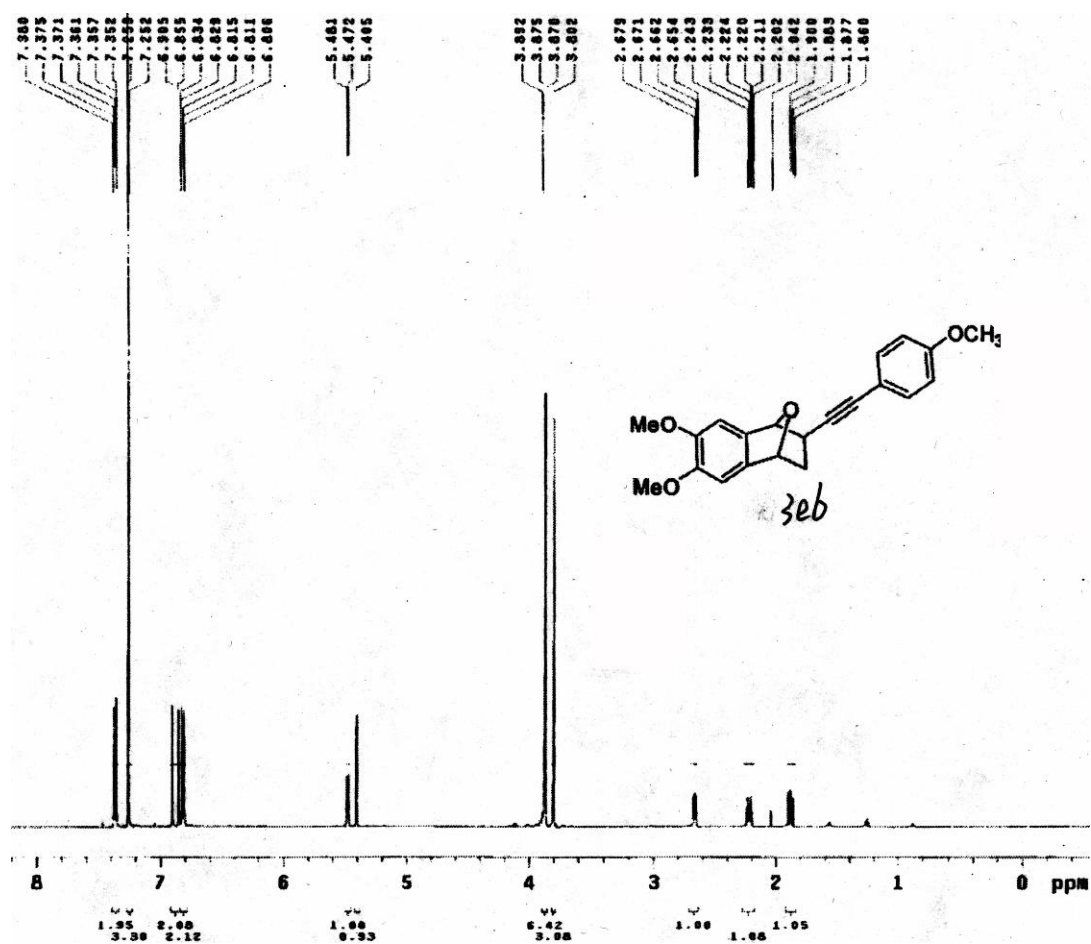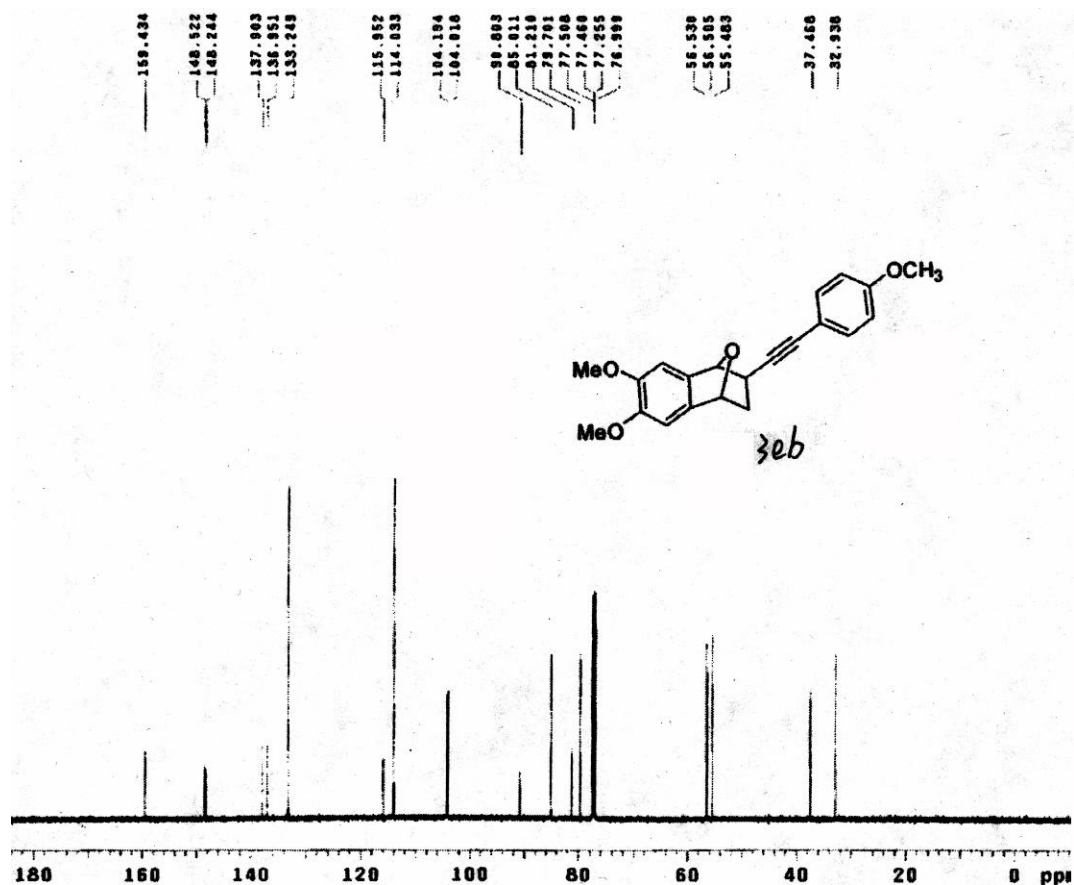

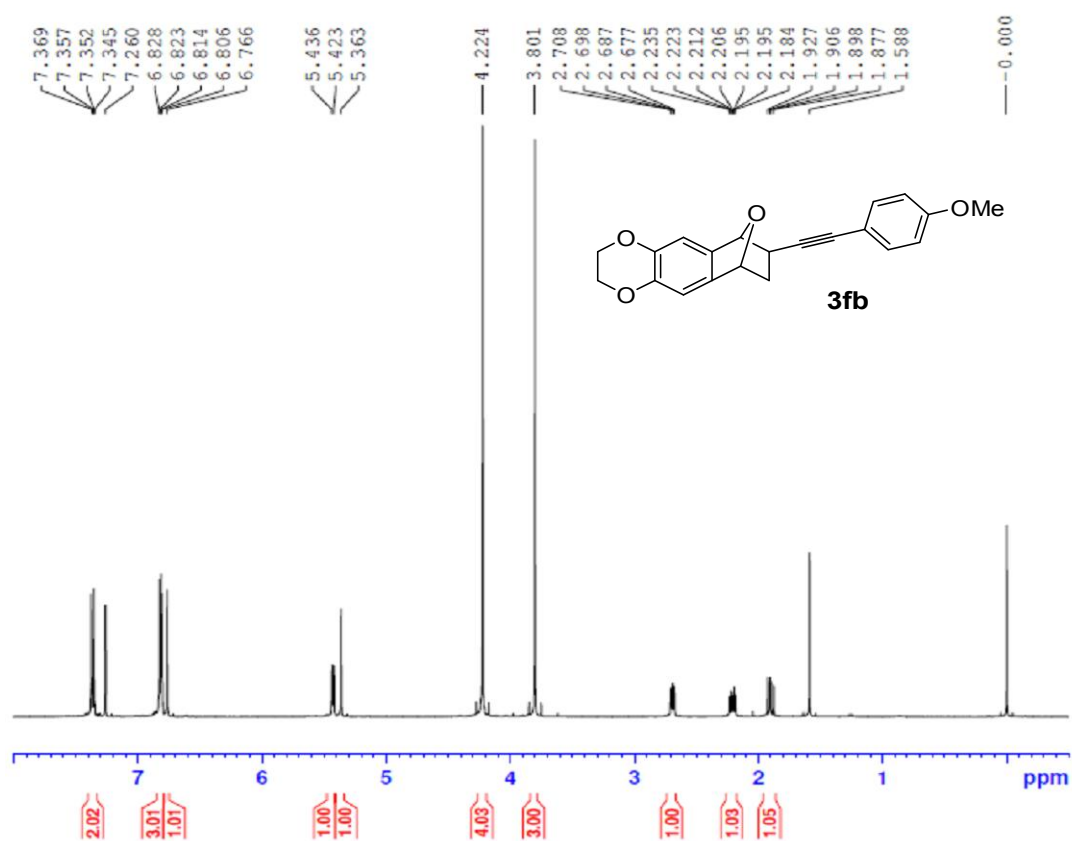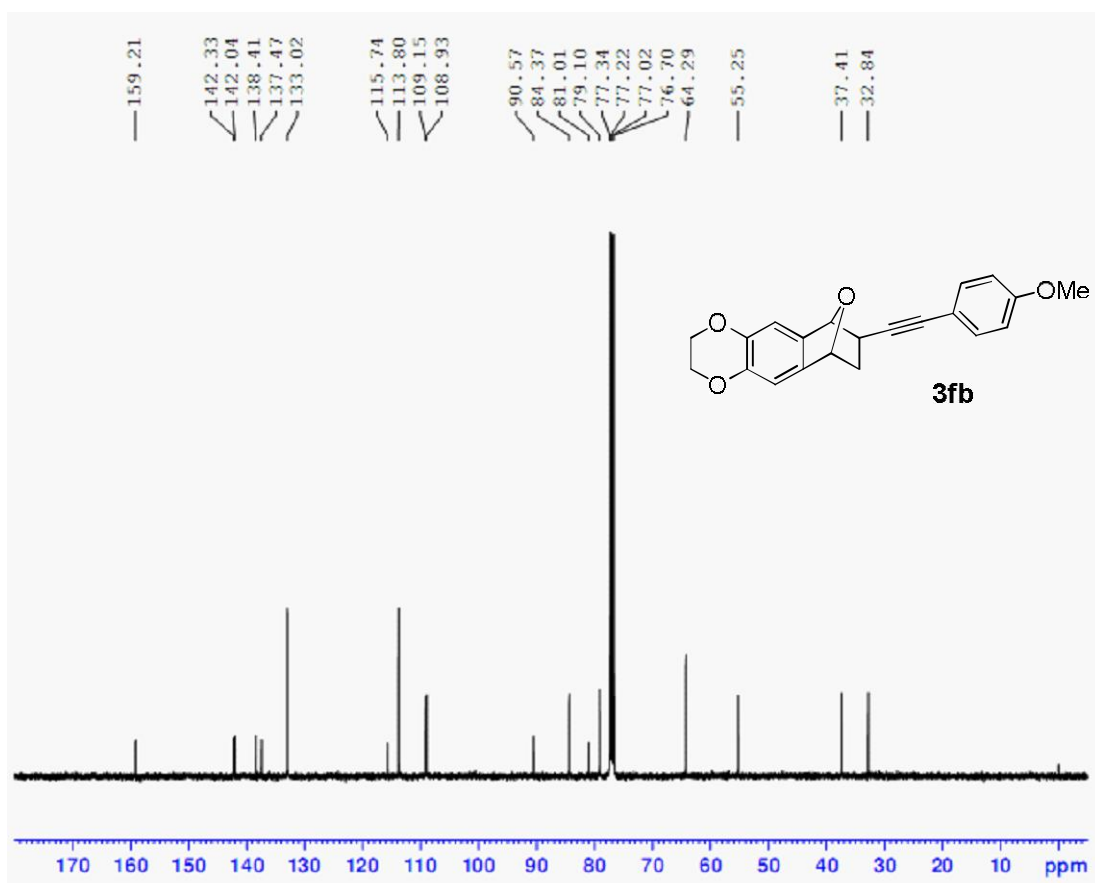

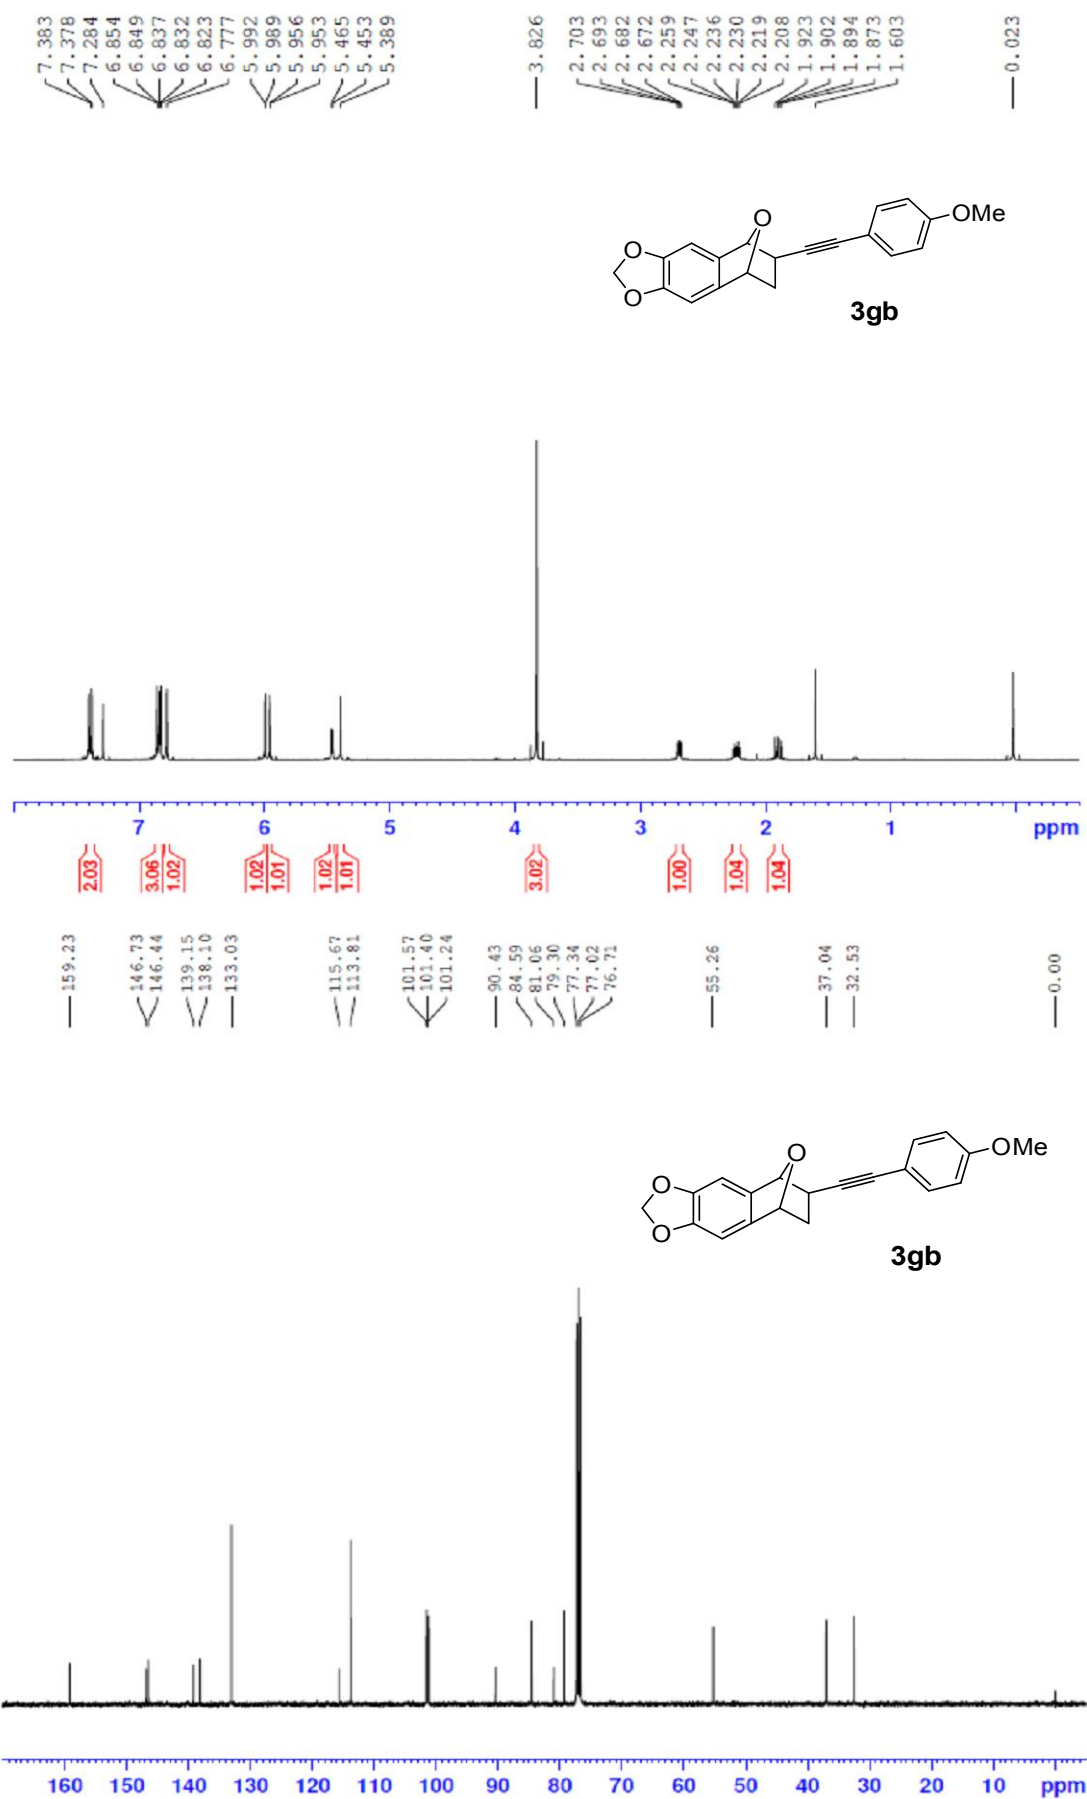

## 2. HPLC spectra of compounds 3aa-hp, 3bb-3gb

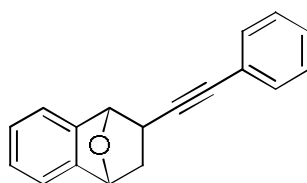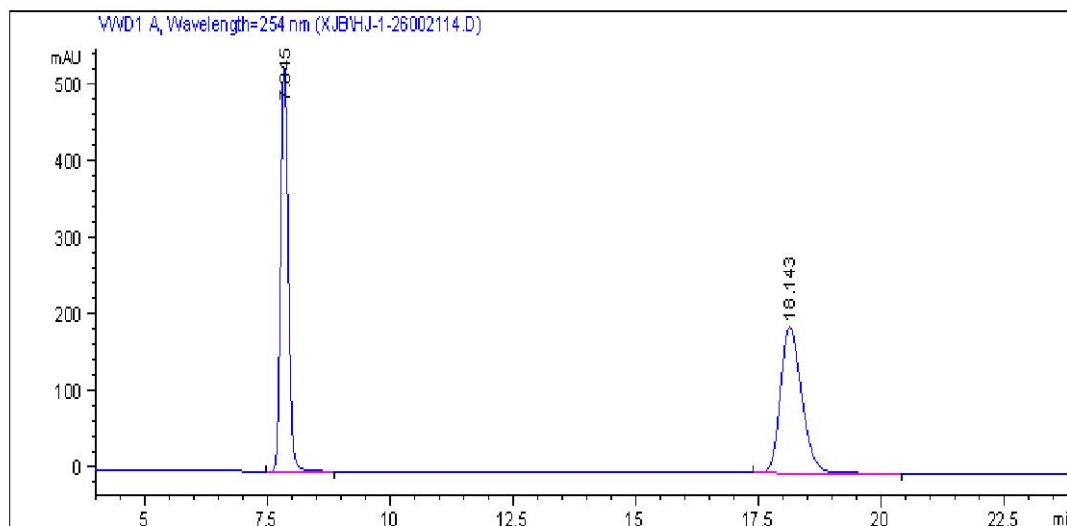

| Peak # | RetTime [min] | Type | Width [min] | Area [mAU*s] | Height [mAU] | Area %  |
|--------|---------------|------|-------------|--------------|--------------|---------|
| 1      | 7.845         | BB   | 0.1672      | 5717.16797   | 528.35010    | 49.8196 |
| 2      | 18.143        | BB   | 0.4670      | 5758.58154   | 190.83932    | 50.1804 |

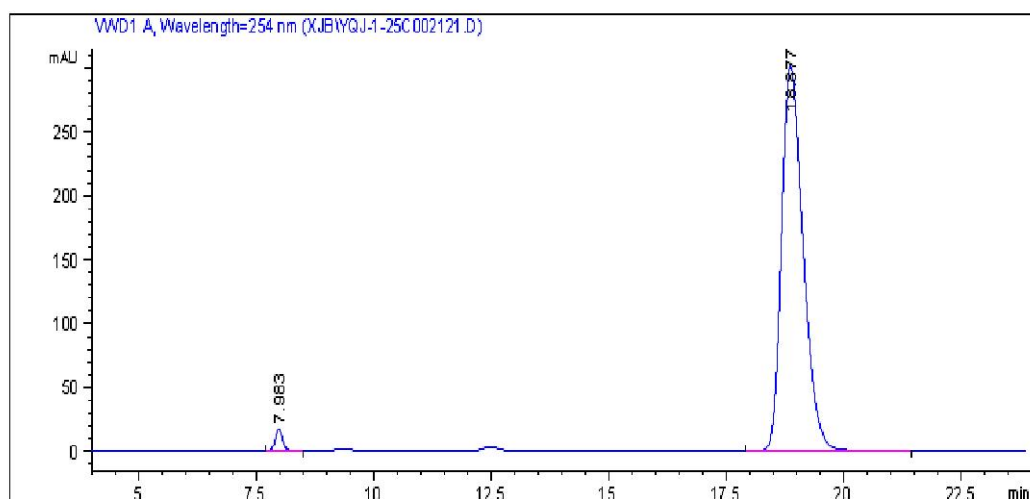

| Peak # | RetTime [min] | Type | Width [min] | Area [mAU*s] | Height [mAU] | Area %  |
|--------|---------------|------|-------------|--------------|--------------|---------|
| 1      | 7.983         | BB   | 0.1709      | 187.69511    | 16.99432     | 1.9135  |
| 2      | 18.877        | BB   | 0.4928      | 9621.49414   | 301.08536    | 98.0865 |

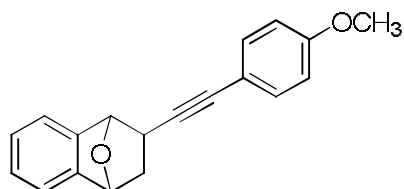

**3ab**

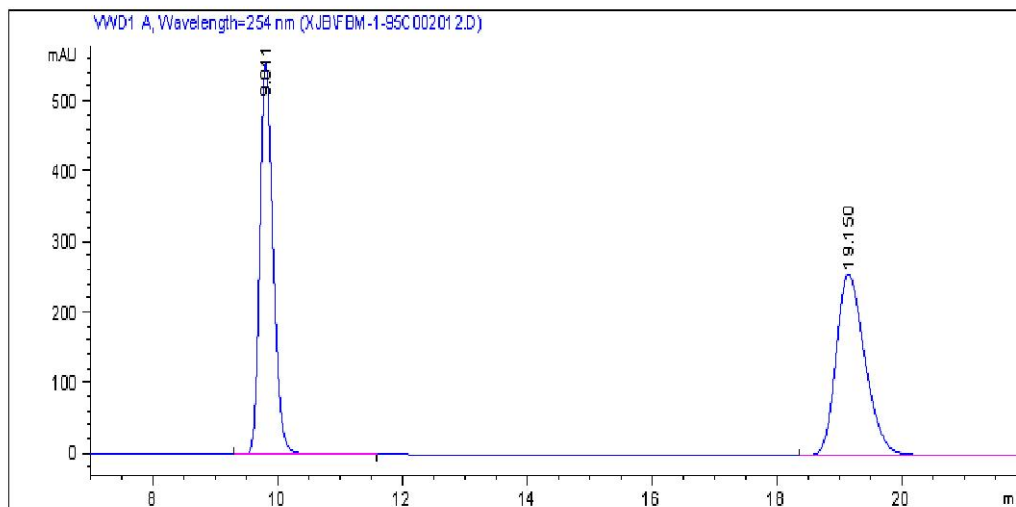

| Peak # | RetTime [min] | Type | Width [min] | Area [mAU*s] | Height [mAU] | Area %  |
|--------|---------------|------|-------------|--------------|--------------|---------|
| 1      | 9.811         | BB   | 0.2313      | 8280.49707   | 554.36389    | 50.0533 |
| 2      | 19.150        | BBA  | 0.4965      | 8262.87695   | 256.73358    | 49.9467 |

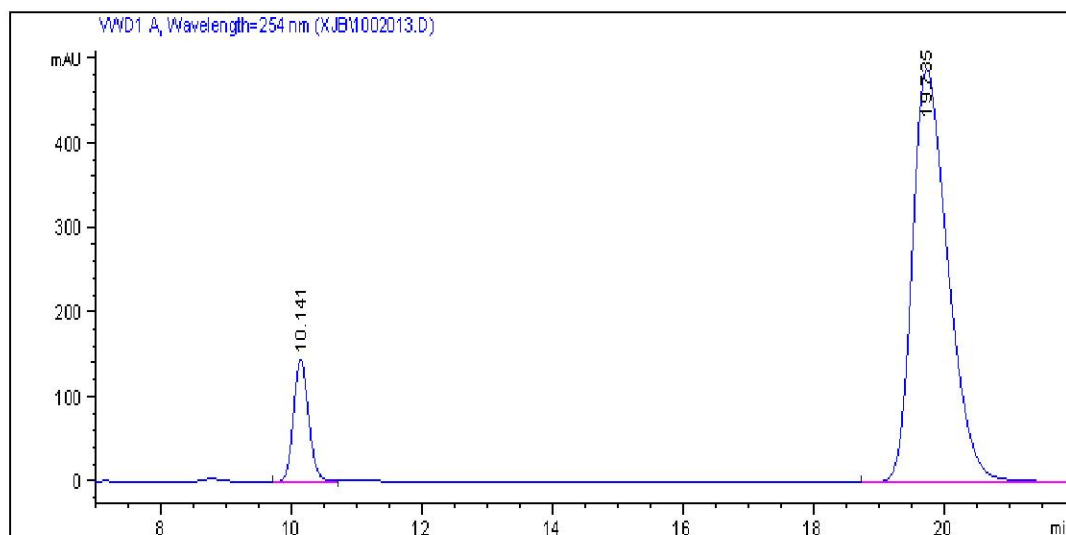

| Peak # | RetTime [min] | Type | Width [min] | Area [mAU*s] | Height [mAU] | Area %  |
|--------|---------------|------|-------------|--------------|--------------|---------|
| 1      | 10.141        | BV   | 0.2466      | 2308.75732   | 145.11409    | 11.0824 |
| 2      | 19.735        | BB   | 0.5796      | 1.85239e4    | 488.23526    | 88.9176 |

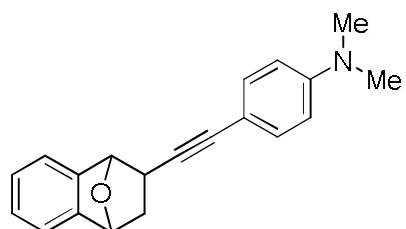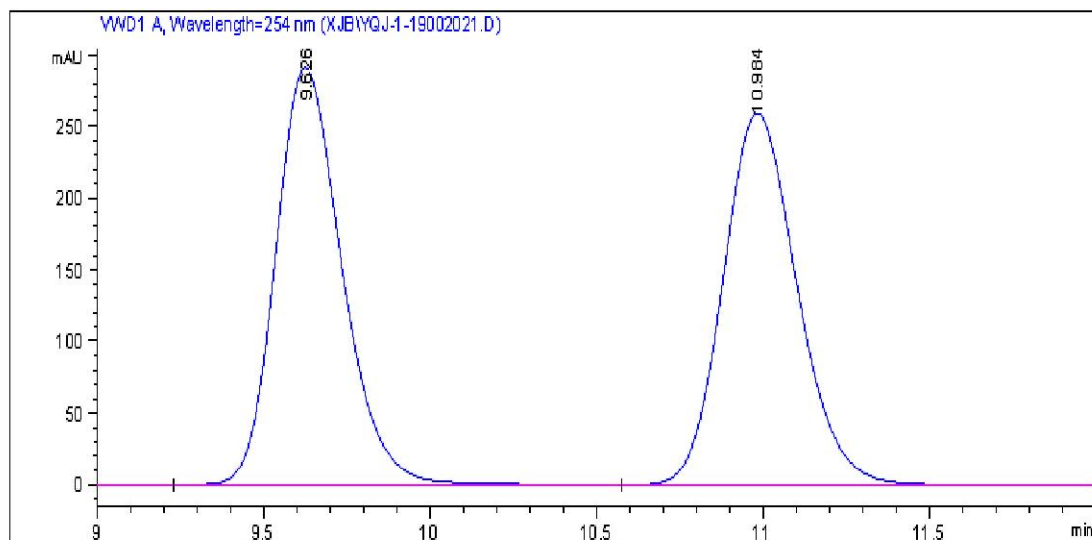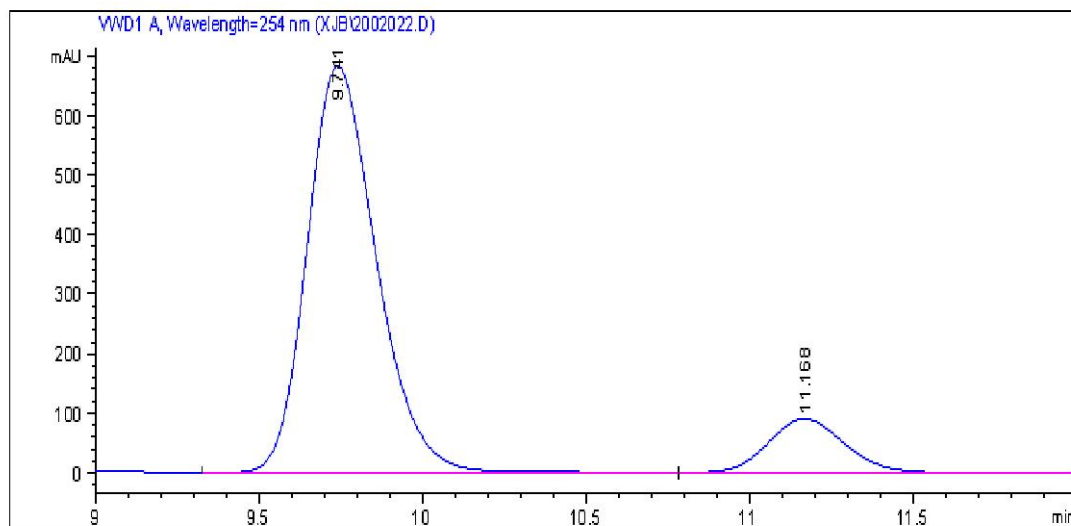

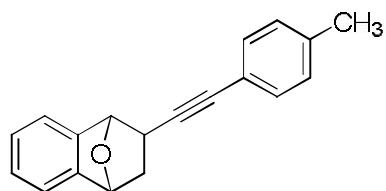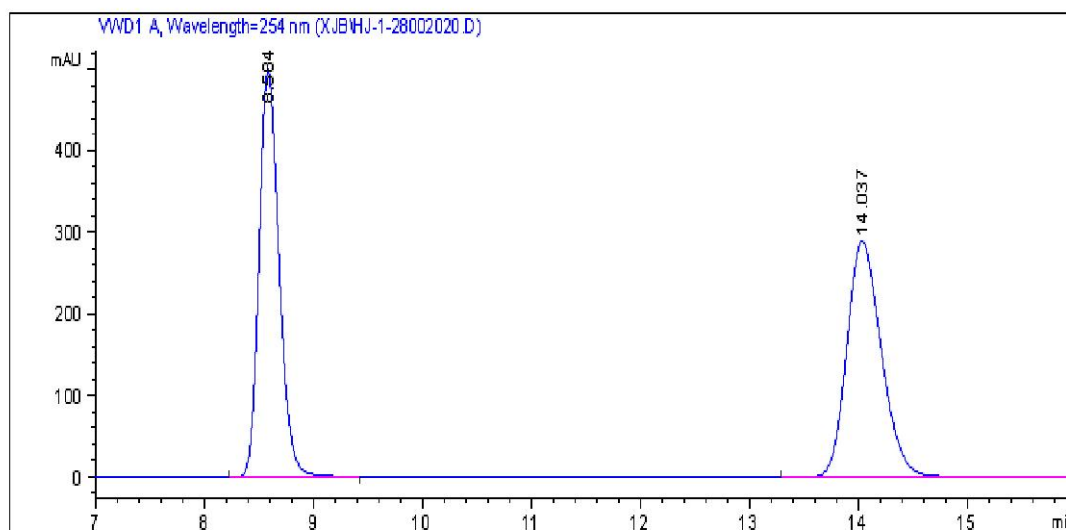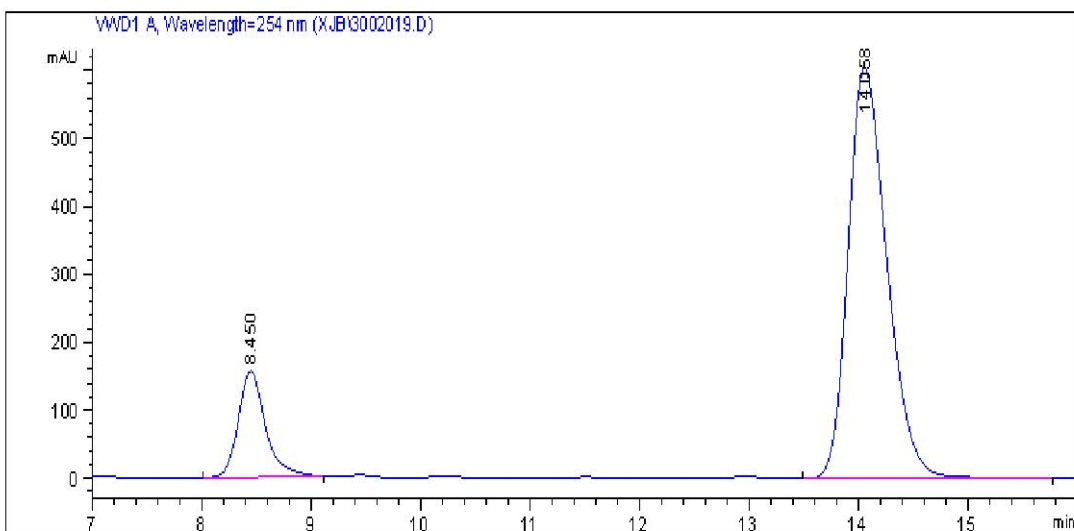



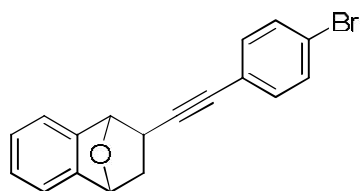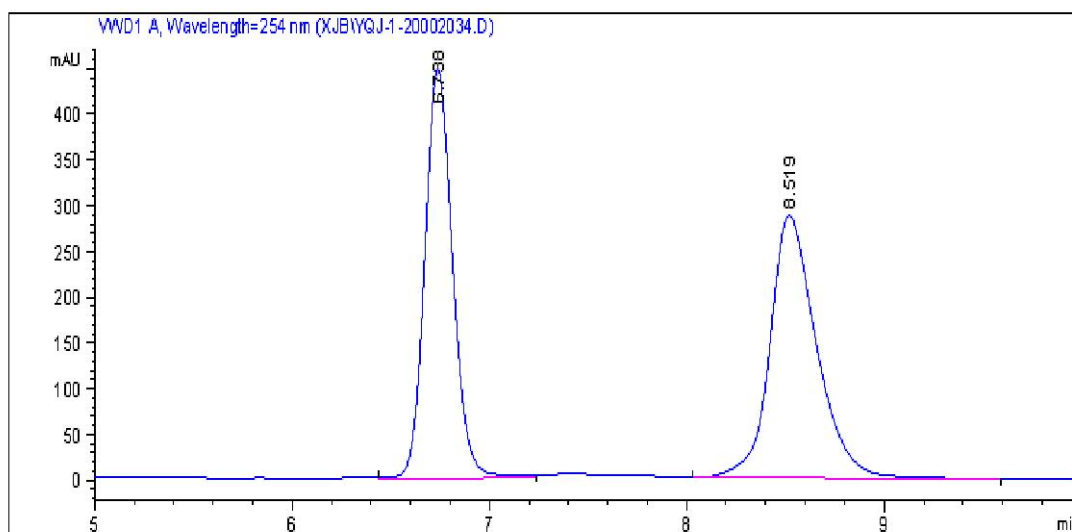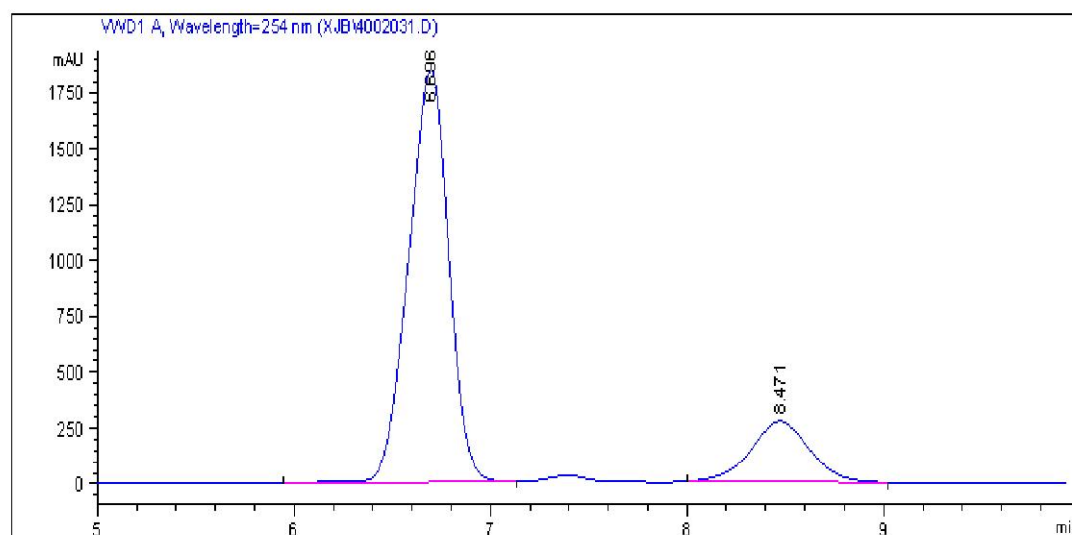

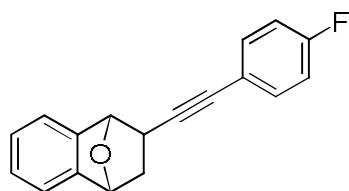

**3af**

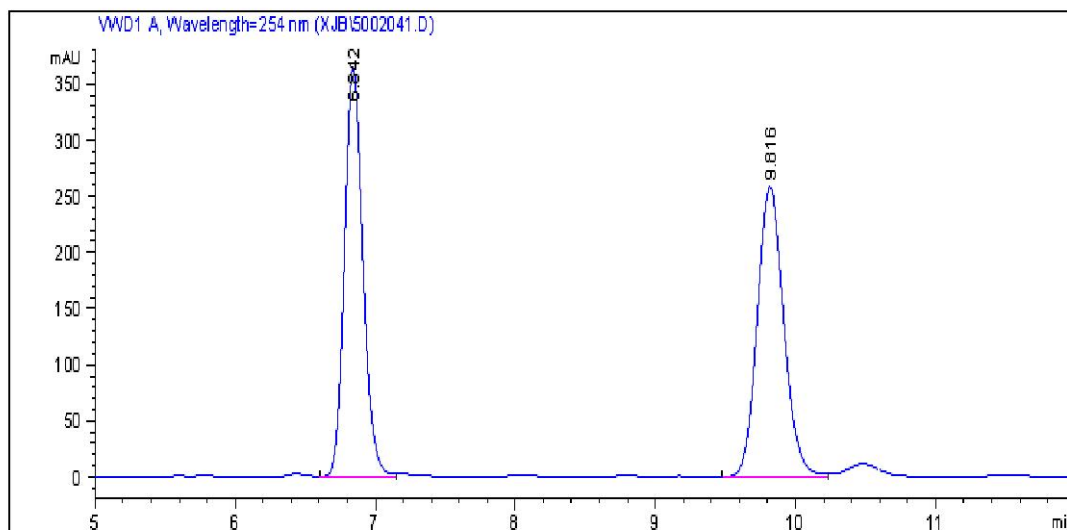

| Peak # | RetTime [min] | Type | Width [min] | Area [mAU*s] | Height [mAU] | Area %  |
|--------|---------------|------|-------------|--------------|--------------|---------|
| 1      | 6.842         | VV   | 0.1416      | 3363.22461   | 364.73386    | 49.7180 |
| 2      | 9.816         | BV   | 0.2036      | 3401.38330   | 258.27783    | 50.2820 |

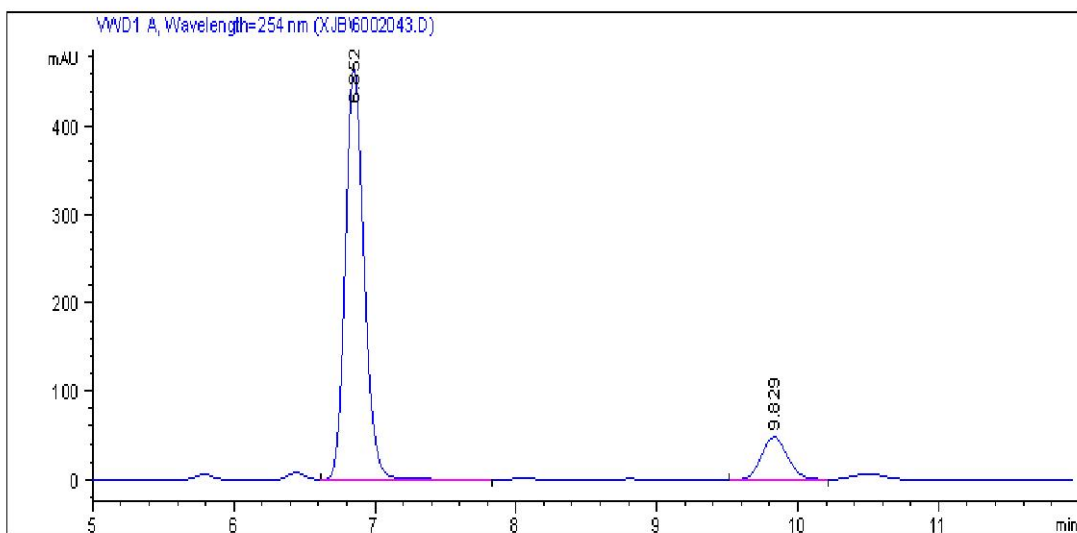

| Peak # | RetTime [min] | Type | Width [min] | Area [mAU*s] | Height [mAU] | Area %  |
|--------|---------------|------|-------------|--------------|--------------|---------|
| 1      | 6.852         | VB   | 0.1428      | 4341.62500   | 465.70303    | 87.4648 |
| 2      | 9.829         | BV   | 0.2024      | 622.22711    | 47.64800     | 12.5352 |

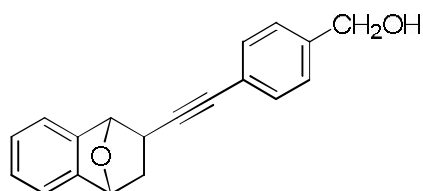

**3ag**

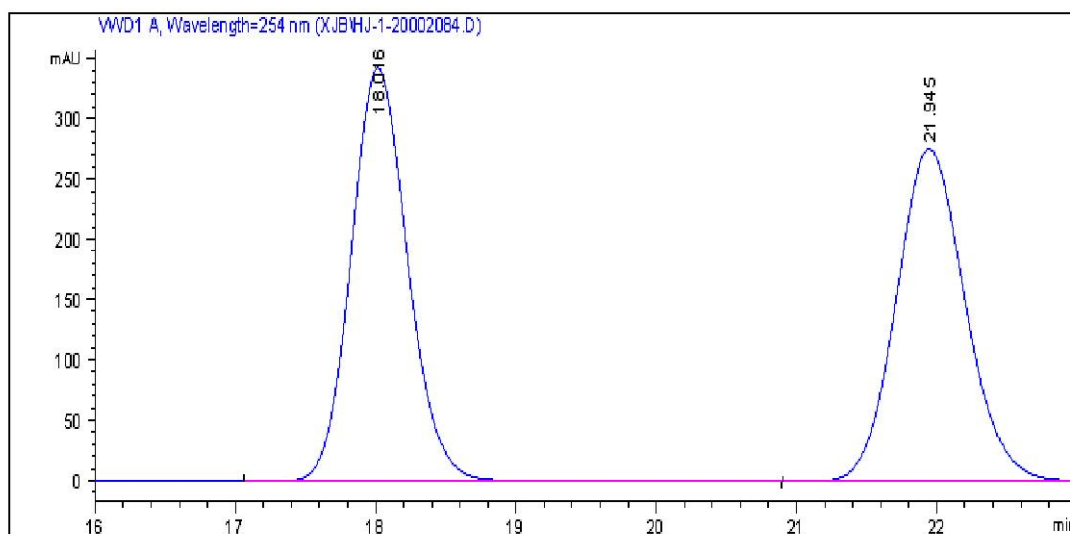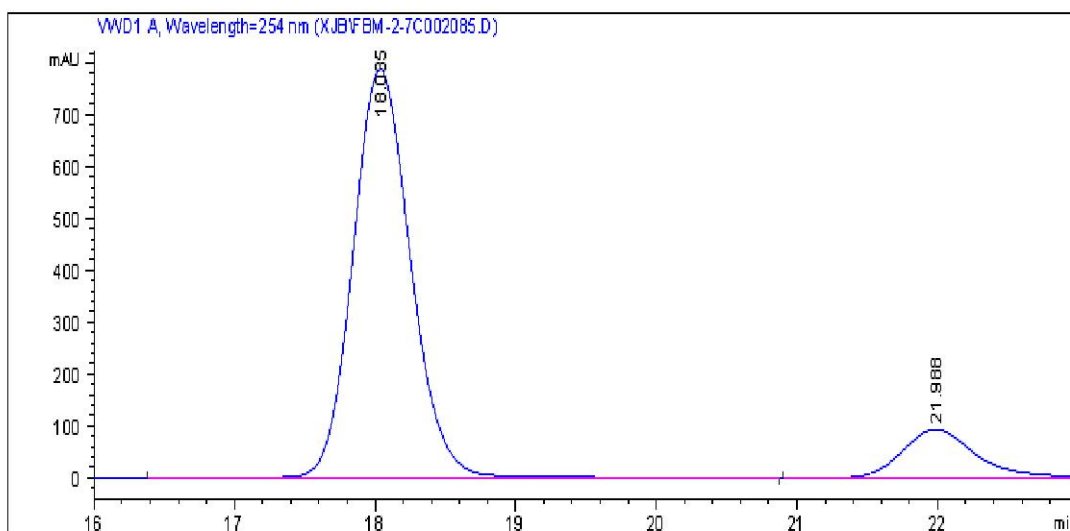

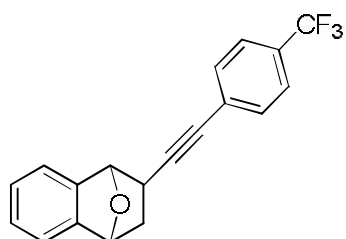

**3ah**

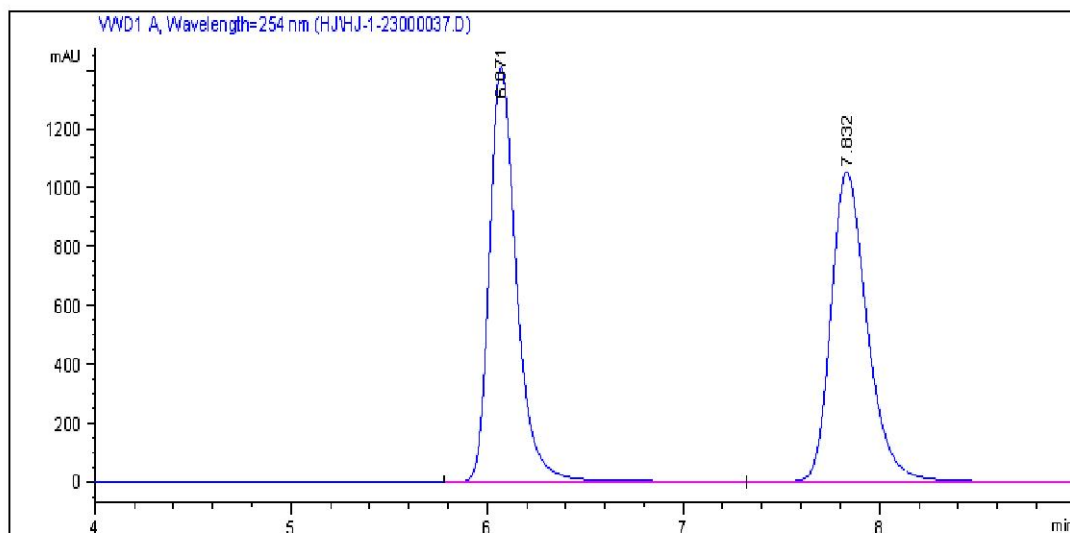

| Peak # | RetTime [min] | Type | Width [min] | Area [mAU*s] | Height [mAU] | Area %  |
|--------|---------------|------|-------------|--------------|--------------|---------|
| 1      | 6.071         | BB   | 0.1463      | 1.36057e4    | 1413.57043   | 50.0030 |
| 2      | 7.832         | BB   | 0.1976      | 1.36040e4    | 1053.80591   | 49.9970 |

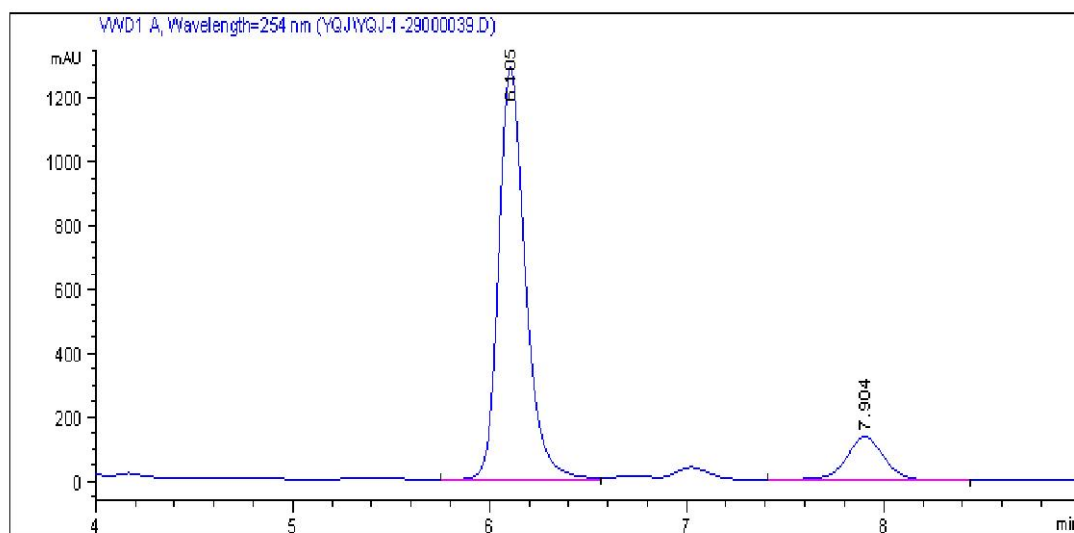

| Peak # | RetTime [min] | Type | Width [min] | Area [mAU*s] | Height [mAU] | Area %  |
|--------|---------------|------|-------------|--------------|--------------|---------|
| 1      | 6.105         | BV   | 0.1443      | 1.21829e4    | 1288.16125   | 86.8522 |
| 2      | 7.904         | BB   | 0.2028      | 1844.27026   | 137.18994    | 13.1478 |

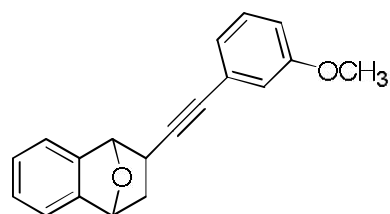

**3ai**

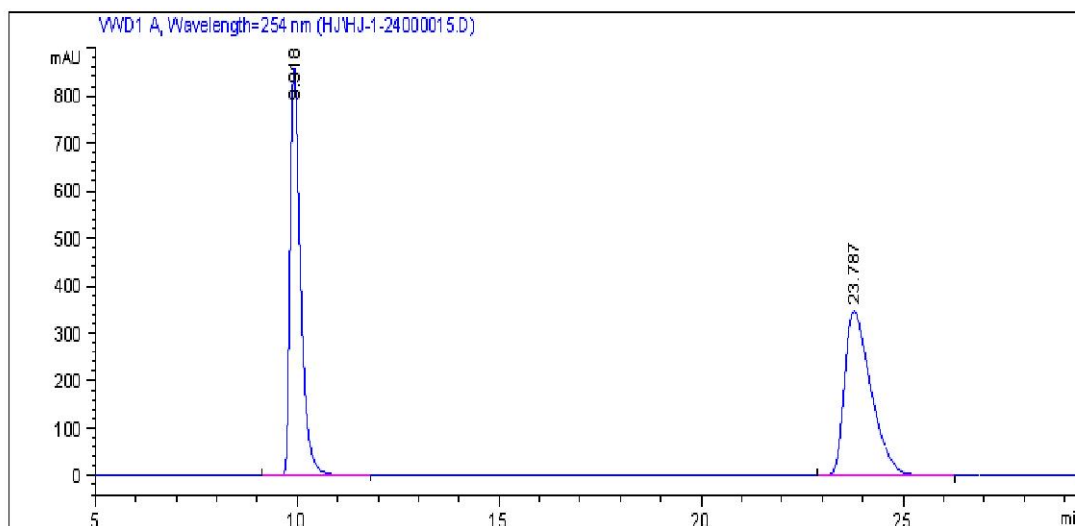

| Peak # | RetTime [min] | Type | Width [min] | Area [mAU*s] | Height [mAU] | Area %  |
|--------|---------------|------|-------------|--------------|--------------|---------|
| 1      | 9.918         | BB   | 0.2706      | 1.54450e4    | 859.70258    | 49.4500 |
| 2      | 23.787        | BB   | 0.6925      | 1.57885e4    | 345.93015    | 50.5500 |

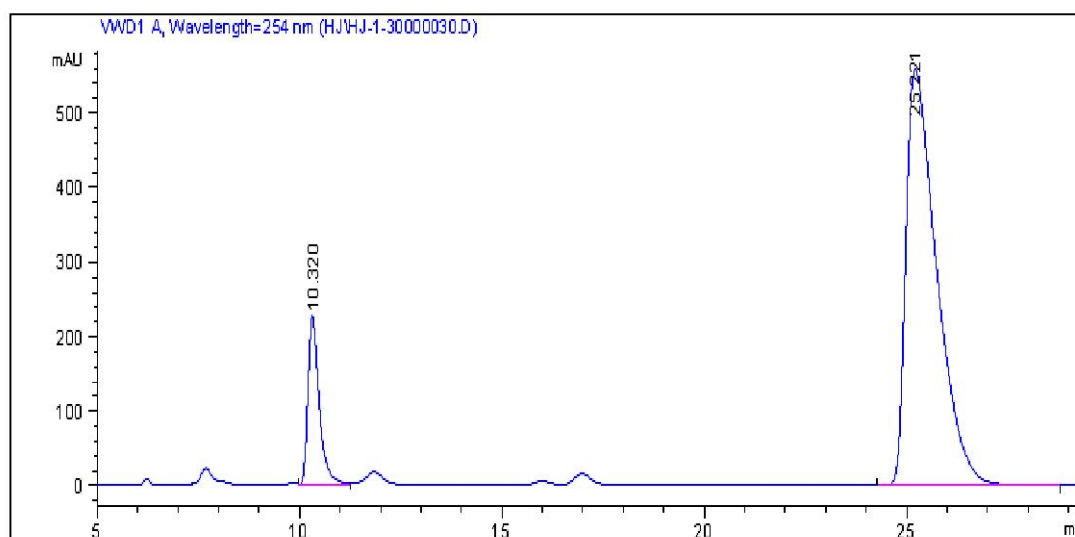

| Peak # | RetTime [min] | Type | Width [min] | Area [mAU*s] | Height [mAU] | Area %  |
|--------|---------------|------|-------------|--------------|--------------|---------|
| 1      | 10.320        | VV   | 0.2952      | 4483.04639   | 227.17894    | 13.1806 |
| 2      | 25.221        | BB   | 0.7957      | 2.95294e4    | 557.77087    | 86.8194 |

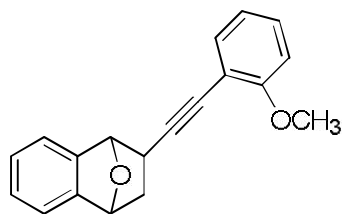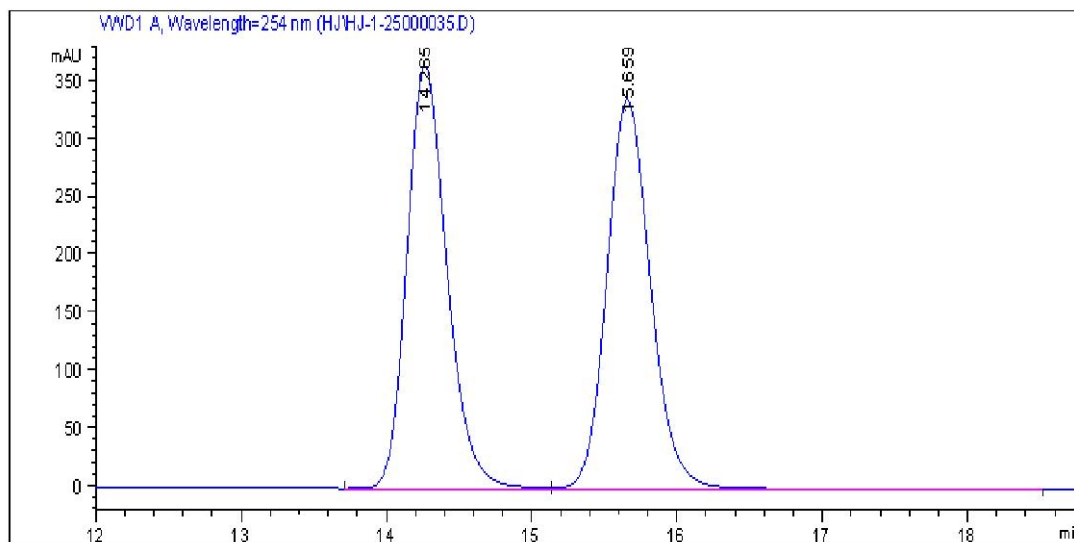

| Peak # | RetTime [min] | Type | Width [min] | Area [mAU*s] | Height [mAU] | Area %  |
|--------|---------------|------|-------------|--------------|--------------|---------|
| 1      | 14.265        | BV   | 0.2957      | 6989.18945   | 364.56241    | 49.9164 |
| 2      | 15.659        | VB   | 0.3224      | 7012.59766   | 336.16391    | 50.0836 |

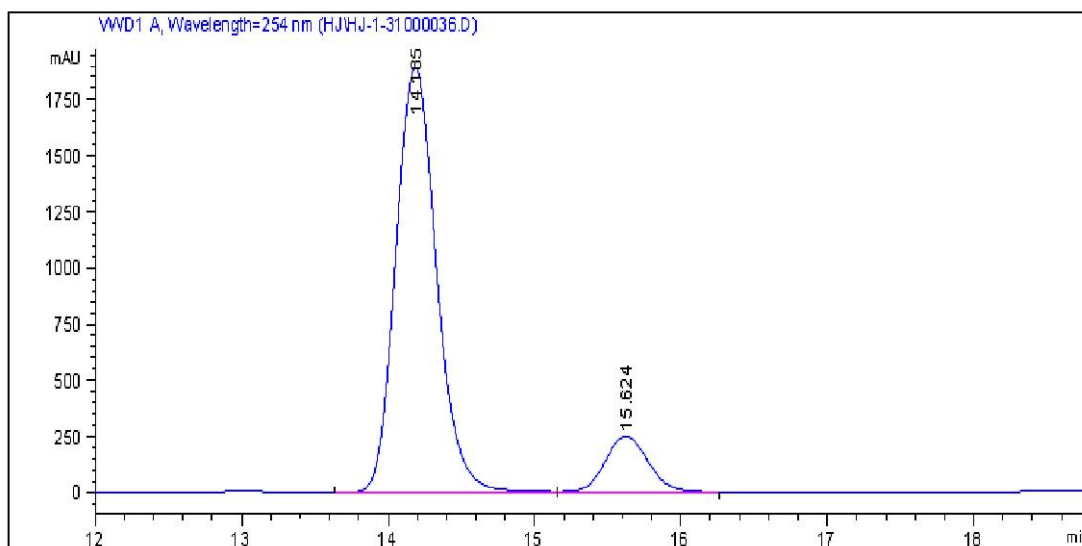

| Peak # | RetTime [min] | Type | Width [min] | Area [mAU*s] | Height [mAU] | Area %  |
|--------|---------------|------|-------------|--------------|--------------|---------|
| 1      | 14.185        | BV   | 0.3025      | 3.66913e4    | 1890.22559   | 87.6327 |
| 2      | 15.624        | VBA  | 0.3189      | 5178.10840   | 251.79834    | 12.3673 |

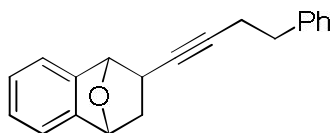

**3ak**

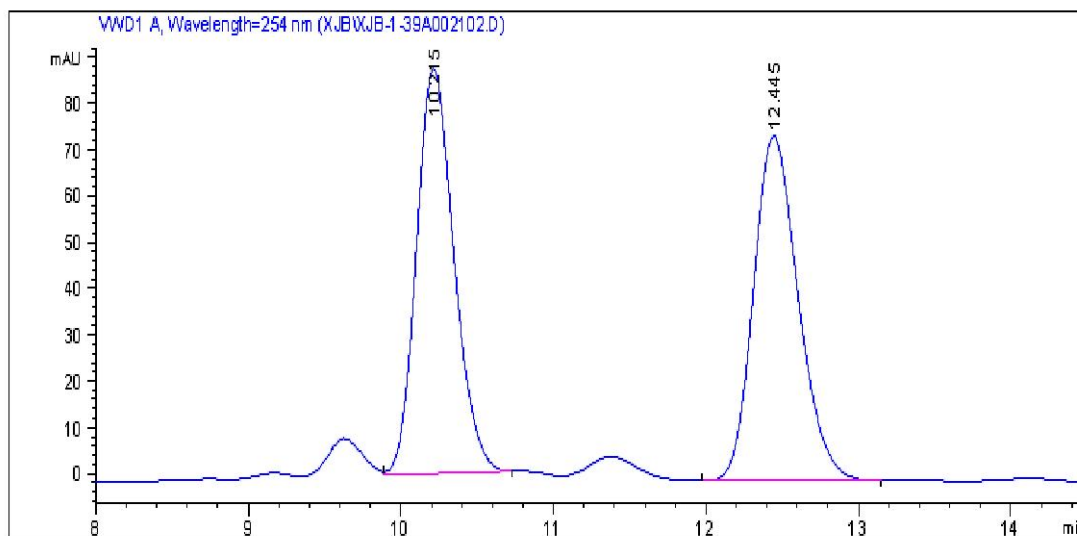

| Peak # | RetTime [min] | Type | Width [min] | Area [mAU*s] | Height [mAU] | Area %  |
|--------|---------------|------|-------------|--------------|--------------|---------|
| 1      | 10.215        | VB   | 0.2635      | 1496.71082   | 87.52846     | 49.5586 |
| 2      | 12.445        | BB   | 0.3145      | 1523.37061   | 74.51788     | 50.4414 |

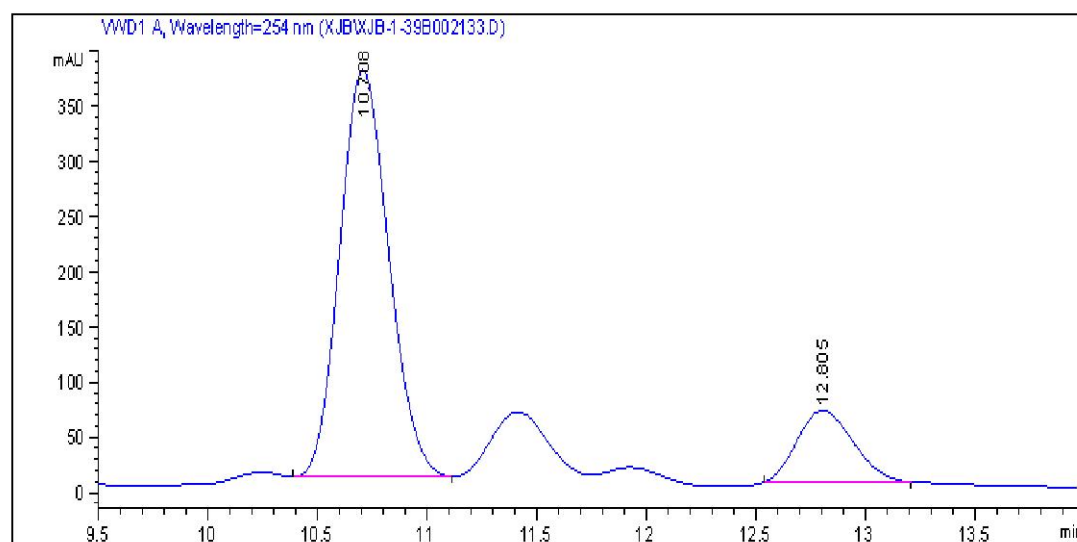

| Peak # | RetTime [min] | Type | Width [min] | Area [mAU*s] | Height [mAU] | Area %  |
|--------|---------------|------|-------------|--------------|--------------|---------|
| 1      | 10.708        | BB   | 0.2422      | 5708.27441   | 367.56067    | 83.3799 |
| 2      | 12.805        | BBA  | 0.2793      | 1137.82715   | 64.33704     | 16.6201 |



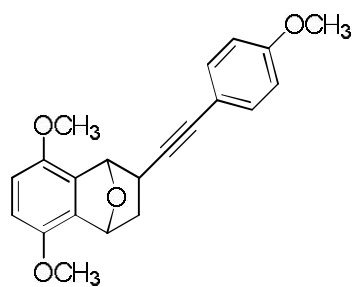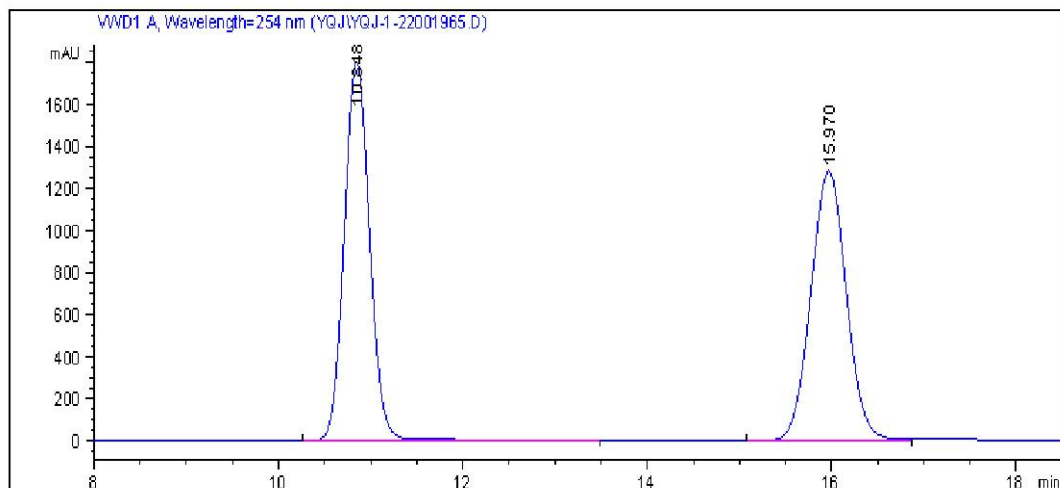

| Peak # | RetTime [min] | Type | Width [min] | Area [mAU*s] | Height [mAU] | Area %  |
|--------|---------------|------|-------------|--------------|--------------|---------|
| 1      | 10.848        | BB   | 0.2983      | 3.44966e4    | 1801.99585   | 50.0788 |
| 2      | 15.970        | BV   | 0.4166      | 3.43881e4    | 1283.54431   | 49.9212 |

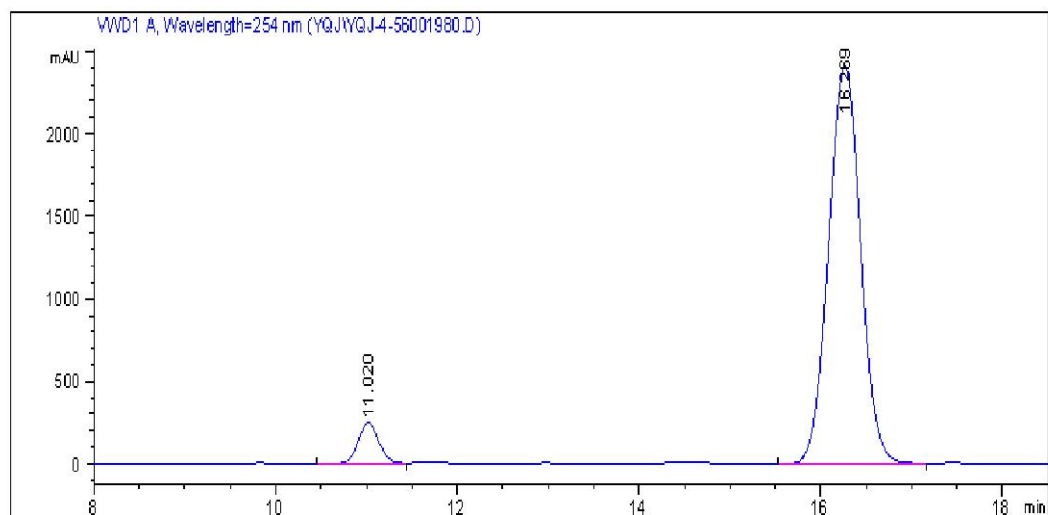

| Peak # | RetTime [min] | Type | Width [min] | Area [mAU*s] | Height [mAU] | Area %  |
|--------|---------------|------|-------------|--------------|--------------|---------|
| 1      | 11.020        | BV   | 0.2473      | 3947.83203   | 245.93077    | 6.2447  |
| 2      | 16.269        | BV   | 0.3842      | 5.92715e4    | 2407.95898   | 93.7553 |

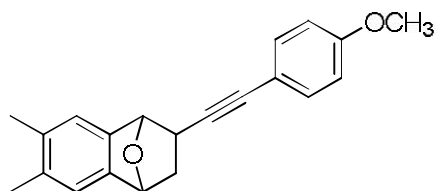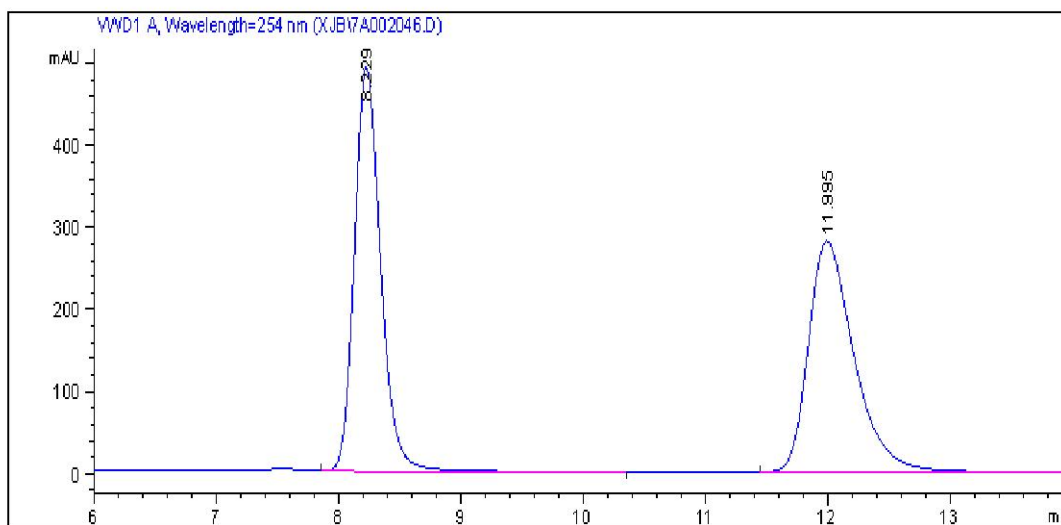

| Peak # | RetTime [min] | Type | Width [min] | Area [mAU*s] | Height [mAU] | Area %  |
|--------|---------------|------|-------------|--------------|--------------|---------|
| 1      | 8.229         | VB   | 0.2290      | 7341.22803   | 492.16089    | 50.0534 |
| 2      | 11.995        | VBA  | 0.3943      | 7325.55078   | 281.79889    | 49.9466 |

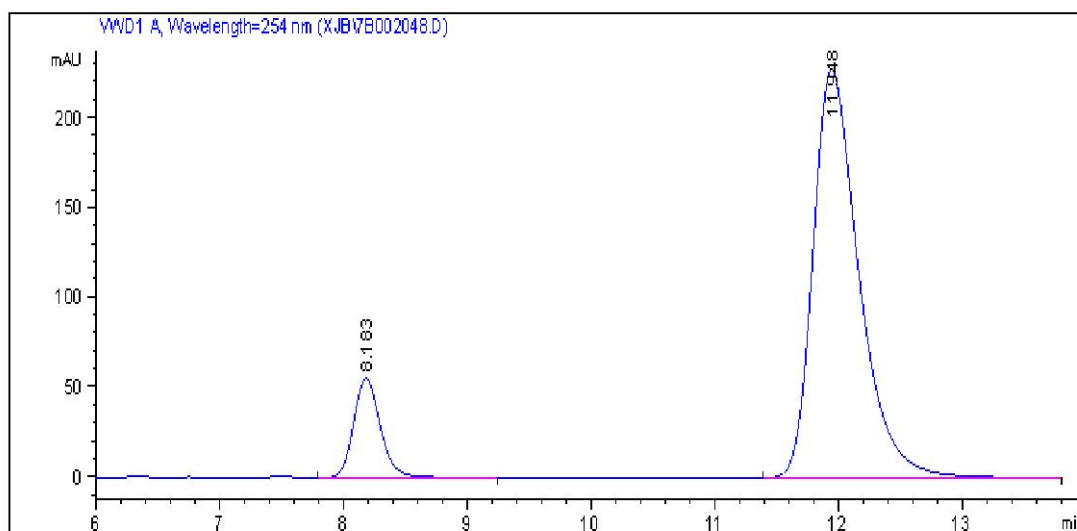

| Peak # | RetTime [min] | Type | Width [min] | Area [mAU*s] | Height [mAU] | Area %  |
|--------|---------------|------|-------------|--------------|--------------|---------|
| 1      | 8.183         | BB   | 0.2325      | 835.56238    | 55.22164     | 12.5151 |
| 2      | 11.948        | BBA  | 0.3899      | 5840.89551   | 227.21033    | 87.4849 |

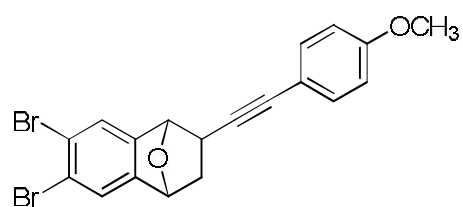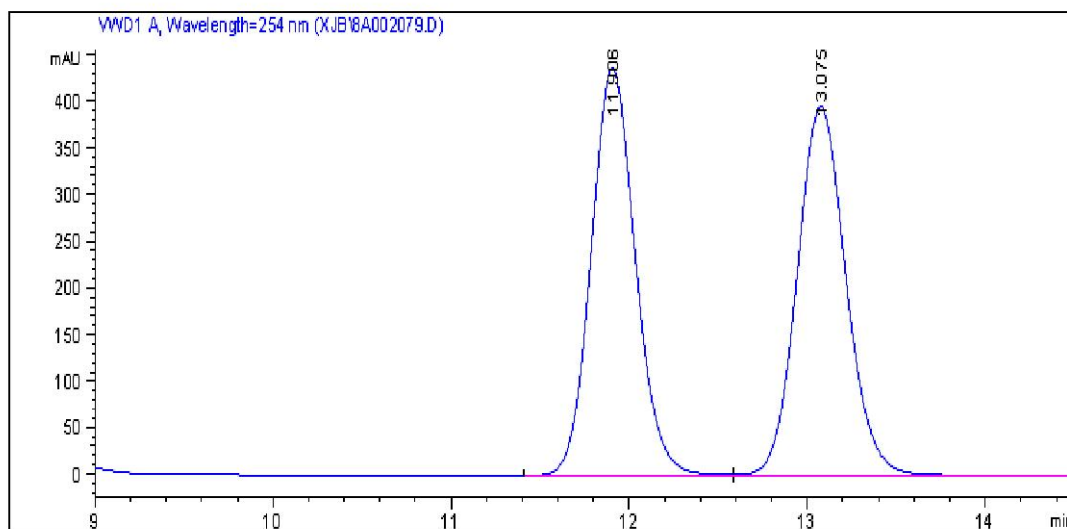

| Peak # | RetTime [min] | Type | Width [min] | Area [mAU*s] | Height [mAU] | Area %  |
|--------|---------------|------|-------------|--------------|--------------|---------|
| 1      | 11.906        | BV   | 0.2675      | 7552.66846   | 437.23721    | 49.8834 |
| 2      | 13.075        | VBA  | 0.2951      | 7587.97559   | 396.86441    | 50.1166 |

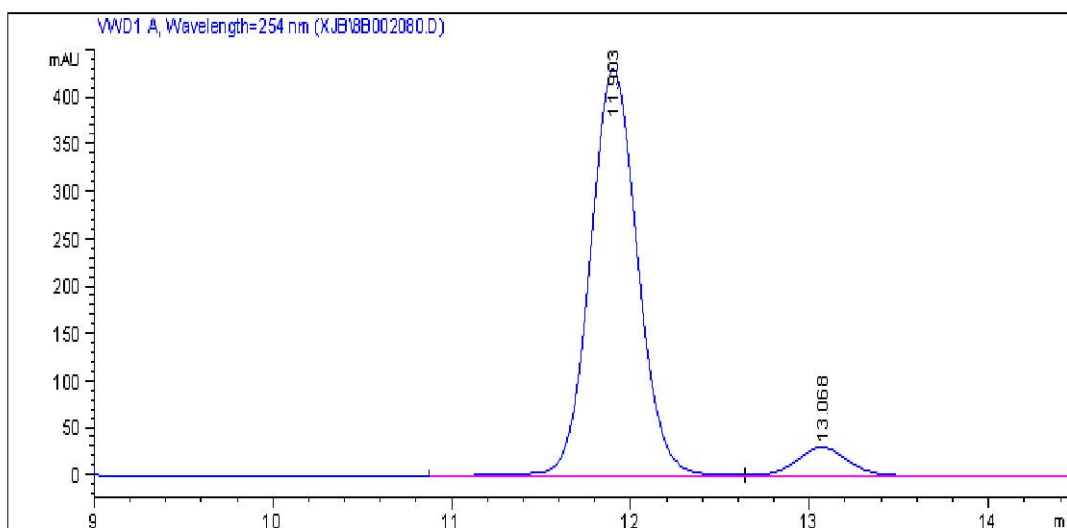

| Peak # | RetTime [min] | Type | Width [min] | Area [mAU*s] | Height [mAU] | Area %  |
|--------|---------------|------|-------------|--------------|--------------|---------|
| 1      | 11.903        | BV   | 0.2854      | 7957.10010   | 430.96405    | 92.6601 |
| 2      | 13.068        | VB   | 0.3159      | 630.30774    | 30.52766     | 7.3399  |

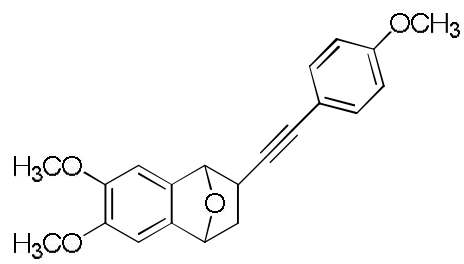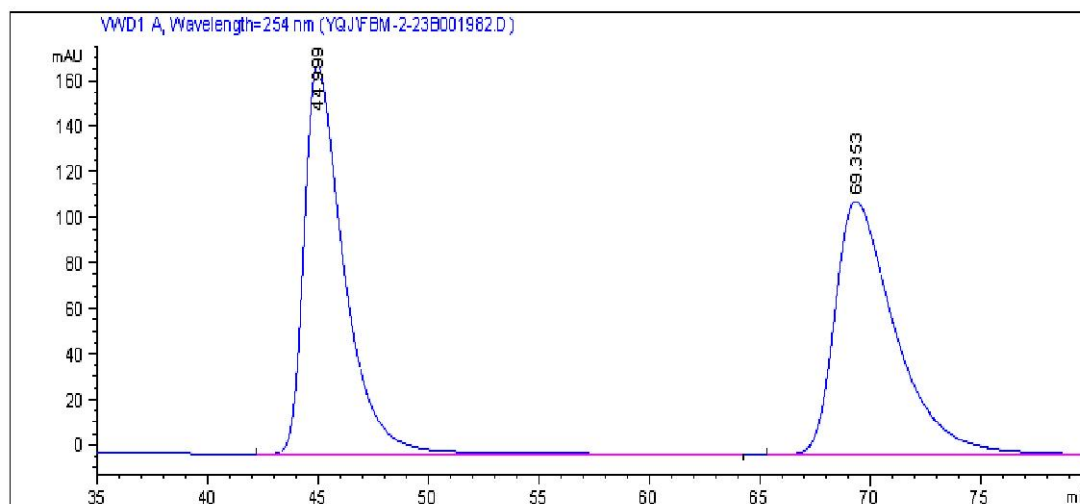

| Peak # | RetTime [min] | Type | Width [min] | Area [mAU*s] | Height [mAU] | Area %  |
|--------|---------------|------|-------------|--------------|--------------|---------|
| 1      | 44.999        | BB   | 1.8534      | 2.14973e4    | 170.68402    | 50.3508 |
| 2      | 69.353        | BBA  | 2.8318      | 2.11978e4    | 111.21119    | 49.6492 |

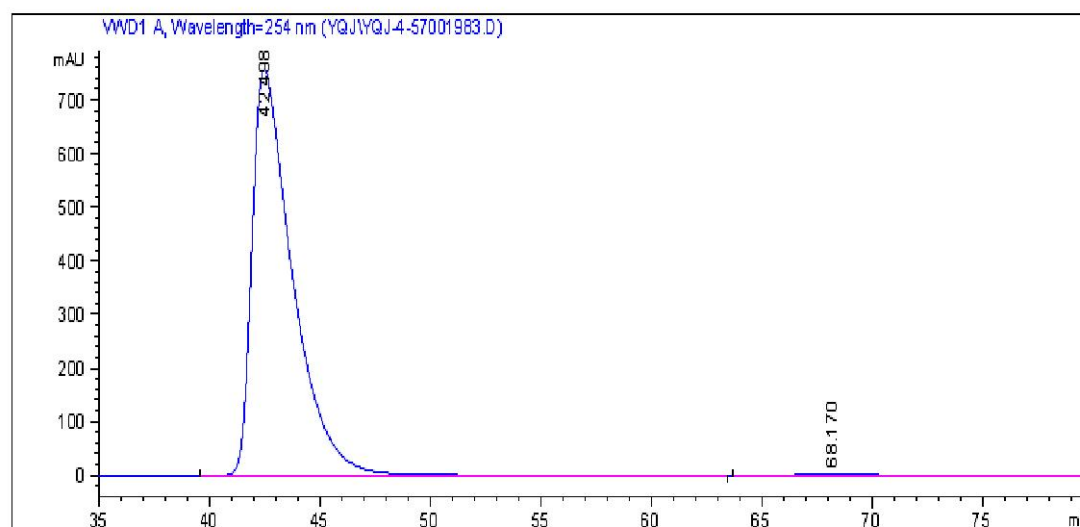

| Peak # | RetTime [min] | Type | Width [min] | Area [mAU*s] | Height [mAU] | Area %  |
|--------|---------------|------|-------------|--------------|--------------|---------|
| 1      | 42.498        | BB   | 1.8984      | 9.69757e4    | 757.09552    | 98.9724 |
| 2      | 68.170        | BBA  | 2.9986      | 1006.82593   | 4.81690      | 1.0276  |

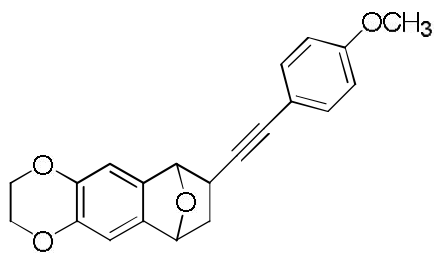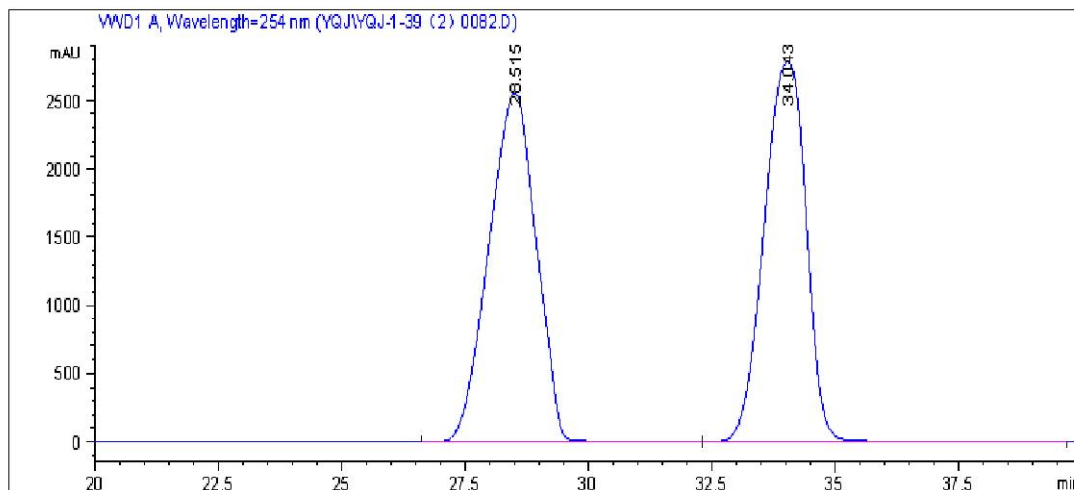

| Peak # | RetTime [min] | Type | Width [min] | Area [mAU*s] | Height [mAU] | Area %  |
|--------|---------------|------|-------------|--------------|--------------|---------|
| 1      | 28.515        | BB   | 1.0212      | 1.70264e5    | 2555.96802   | 50.8443 |
| 2      | 34.043        | BV   | 0.9421      | 1.64609e5    | 2782.97803   | 49.1557 |

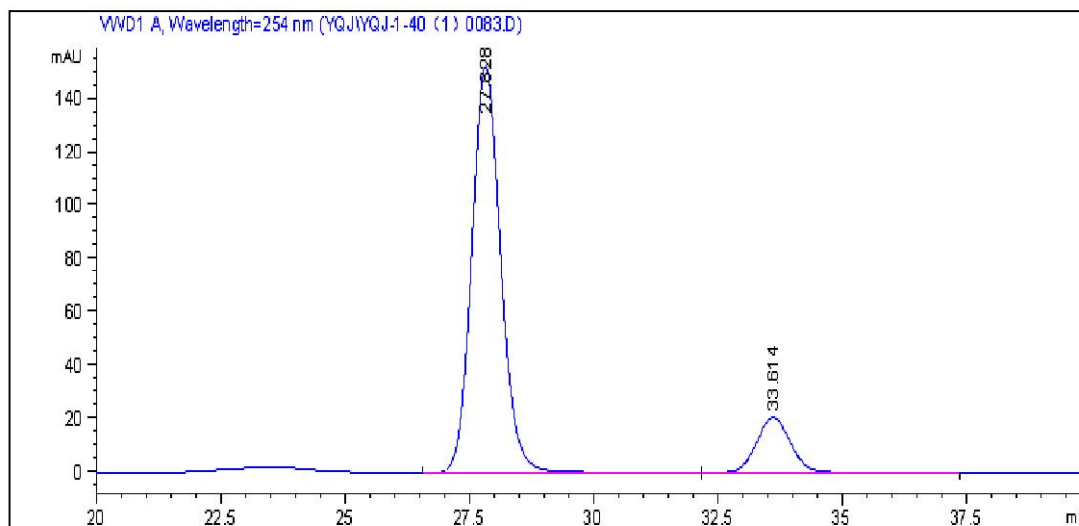

| Peak # | RetTime [min] | Type | Width [min] | Area [mAU*s] | Height [mAU] | Area %  |
|--------|---------------|------|-------------|--------------|--------------|---------|
| 1      | 27.828        | BB   | 0.6242      | 6174.51123   | 152.55223    | 86.3058 |
| 2      | 33.614        | BB   | 0.7392      | 979.71710    | 20.58612     | 13.6942 |

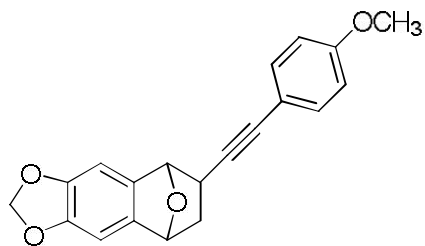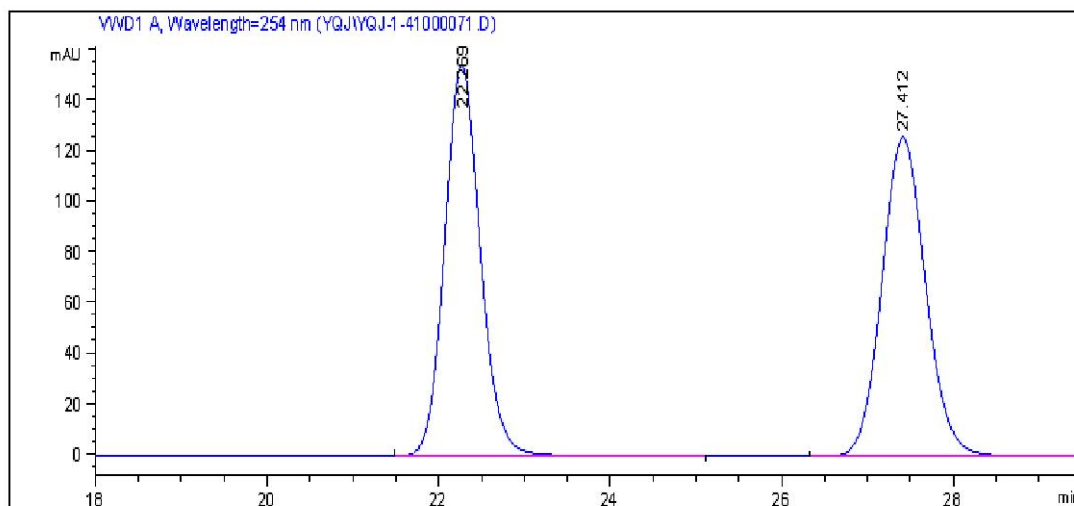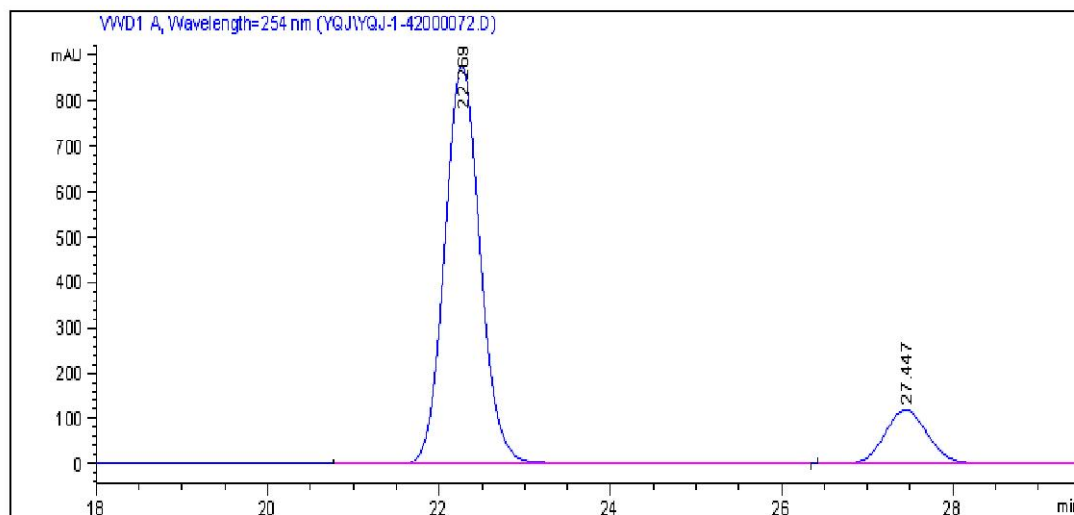

Supplement: c2ob26775f.pdf [file c2ob26775f.pdf]
